# Supplementary material
Source: publisher site journal article supplement (https://www.spandidos-publications.com/2138/downloadSupplementary)
Supplement: Supplementary file 1 [file downloadSupplementary]

## Sheet: Supplementary table IV
Table SIV. Differentially expressed cellular components of GO enrichment.
maxLevel	levels	GO_Name	GO_ID	P-value	P-value_adjusted	Genes	Count	Pop_Hit	List_Total	Background_Genes	URL
4	3,4	intracellular organelle part	GO:0044446	9.81×10-28	4.12×10-25	NDRG1|1.88;CDKN2A|1.86;GTF2F1|1.8;PSMA1|1.74;SRRM1|1.69;STMN1|1.67;CLIP1|1.66;TMEM109|1.61;DBNL|1.6;S100A11|1.58;SRI|1.57;PPP1R12A|1.54;S100A6|1.52;DDOST|0.74;SFXN3|0.74;LPCAT1|0.74;SLC25A1|0.74;MRPL21|0.74;TECR|0.74;ATP6V0D1|0.74;AIFM1|0.74;MUT|0.74;PDHA1|0.74;SMARCA4|0.74;OAT|0.73;FKBP10|0.73;BSG|0.73;ACP2|0.73;DLD|0.73;STT3A|0.73;SSR1|0.73;HDAC2|0.73;GNS|0.73;SLTM|0.73;MRPL54|0.72;NARS2|0.72;A…	93	12270	109	35391	http://www.ebi.ac.uk/QuickGO/GTerm?id=GO:0044446
2	2	organelle part	GO:0044422	7.62×10-27	1.60×10-24	NDRG1|1.88;CDKN2A|1.86;GTF2F1|1.8;PSMA1|1.74;SRRM1|1.69;STMN1|1.67;CLIP1|1.66;TMEM109|1.61;DBNL|1.6;S100A11|1.58;SRI|1.57;PPP1R12A|1.54;S100A6|1.52;DDOST|0.74;SFXN3|0.74;LPCAT1|0.74;SLC25A1|0.74;MRPL21|0.74;TECR|0.74;ATP6V0D1|0.74;AIFM1|0.74;MUT|0.74;PDHA1|0.74;SMARCA4|0.74;OAT|0.73;FKBP10|0.73;BSG|0.73;ACP2|0.73;DLD|0.73;STT3A|0.73;SSR1|0.73;HDAC2|0.73;GNS|0.73;SLTM|0.73;MRPL54|0.72;NARS2|0.72;A…	93	12570	109	35391	http://www.ebi.ac.uk/QuickGO/GTerm?id=GO:0044422
3	3	membrane-bounded organelle	GO:0043227	8.73×10-25	1.22×10-22	NDRG1|1.88;CDKN2A|1.86;GTF2F1|1.8;PSMA1|1.74;SLK|1.69;SRRM1|1.69;STMN1|1.67;CLIP1|1.66;TMEM109|1.61;DBNL|1.6;S100A11|1.58;SRI|1.57;PPP1R12A|1.54;UBE2K|1.53;S100A6|1.52;TAGLN2|1.51;DDOST|0.74;SFXN3|0.74;LPCAT1|0.74;SLC25A1|0.74;MRPL21|0.74;TECR|0.74;ATP6V0D1|0.74;AIFM1|0.74;APMAP|0.74;MUT|0.74;PDHA1|0.74;SMARCA4|0.74;OAT|0.73;FKBP10|0.73;BSG|0.73;ACP2|0.73;DLD|0.73;ALCAM|0.73;ITGA5|0.73;STT3A|0.73…	105	18542	109	35391	http://www.ebi.ac.uk/QuickGO/GTerm?id=GO:0043227
5	4,5	cytoplasmic part	GO:0044444	1.83×10-24	1.92×10-22	NDRG1|1.88;CDKN2A|1.86;PSMA1|1.74;SRRM1|1.69;STMN1|1.67;CLIP1|1.66;TMEM109|1.61;DBNL|1.6;SRI|1.57;PPP1R12A|1.54;S100A6|1.52;DDOST|0.74;SFXN3|0.74;LPCAT1|0.74;SLC25A1|0.74;MRPL21|0.74;TECR|0.74;ATP6V0D1|0.74;AIFM1|0.74;MUT|0.74;PDHA1|0.74;OAT|0.73;FKBP10|0.73;BSG|0.73;ACP2|0.73;DLD|0.73;ITGA5|0.73;STT3A|0.73;SSR1|0.73;GNS|0.73;ECH1|0.72;MRPL54|0.72;NARS2|0.72;ATP5L|0.72;YBX3|0.72;SERPINH1|0.72;DHX…	87	11405	109	35391	http://www.ebi.ac.uk/QuickGO/GTerm?id=GO:0044444
5	4,5	mitochondrial part	GO:0044429	7.17×10-23	6.03×10-21	SFXN3|0.74;SLC25A1|0.74;MRPL21|0.74;AIFM1|0.74;MUT|0.74;PDHA1|0.74;OAT|0.73;DLD|0.73;MRPL54|0.72;NARS2|0.72;ATP5L|0.72;DHX30|0.72;GLS|0.72;TUFM|0.71;PTPMT1|0.71;NDUFA10|0.71;C1QBP|0.7;NDUFA13|0.7;CARS2|0.7;DNAJA3|0.69;CYB5B|0.69;PNPT1|0.69;POLDIP2|0.68;ETHE1|0.68;MDH2|0.68;AURKAIP1|0.68;CS|0.68;PHB2|0.67;CLPX|0.67;PDHB|0.67;MCCC2|0.64;LARS2|0.64;GSTK1|0.56	33	1171	109	35391	http://www.ebi.ac.uk/QuickGO/GTerm?id=GO:0044429
6	5,6	mitochondrial matrix	GO:0005759	4.81×10-21	3.37×10-19	MRPL21|0.74;MUT|0.74;PDHA1|0.74;OAT|0.73;DLD|0.73;NARS2|0.72;DHX30|0.72;GLS|0.72;TUFM|0.71;NDUFA10|0.71;C1QBP|0.7;CARS2|0.7;DNAJA3|0.69;POLDIP2|0.68;ETHE1|0.68;MDH2|0.68;CS|0.68;CLPX|0.67;PDHB|0.67;MCCC2|0.64;LARS2|0.64;GSTK1|0.56	22	416	109	35391	http://www.ebi.ac.uk/QuickGO/GTerm?id=GO:0005759
6	5,6	mitochondrion	GO:0005739	9.94×10-21	5.96×10-19	SRI|1.57;SFXN3|0.74;SLC25A1|0.74;MRPL21|0.74;AIFM1|0.74;MUT|0.74;PDHA1|0.74;OAT|0.73;BSG|0.73;DLD|0.73;ECH1|0.72;MRPL54|0.72;NARS2|0.72;ATP5L|0.72;DHX30|0.72;GLS|0.72;TUFM|0.71;PTPMT1|0.71;NDUFA10|0.71;C1QBP|0.7;CYBA|0.7;NDUFA13|0.7;CARS2|0.7;CDK1|0.69;DNAJA3|0.69;CYB5B|0.69;PNPT1|0.69;POLDIP2|0.68;ETHE1|0.68;MDH2|0.68;AURKAIP1|0.68;CS|0.68;PHB2|0.67;CLPX|0.67;PDHB|0.67;PARP1|0.66;ACAD9|0.64;MCCC…	41	2370	109	35391	http://www.ebi.ac.uk/QuickGO/GTerm?id=GO:0005739
2	2	organelle	GO:0043226	1.38×10-20	7.23×10-19	NDRG1|1.88;CDKN2A|1.86;GTF2F1|1.8;PSMA1|1.74;SLK|1.69;SRRM1|1.69;STMN1|1.67;CLIP1|1.66;TMEM109|1.61;DBNL|1.6;S100A11|1.58;SRI|1.57;PPP1R12A|1.54;UBE2K|1.53;S100A6|1.52;TAGLN2|1.51;DDOST|0.74;SFXN3|0.74;LPCAT1|0.74;SLC25A1|0.74;MRPL21|0.74;TECR|0.74;ATP6V0D1|0.74;AIFM1|0.74;APMAP|0.74;MUT|0.74;PDHA1|0.74;SMARCA4|0.74;OAT|0.73;FKBP10|0.73;BSG|0.73;ACP2|0.73;DLD|0.73;ALCAM|0.73;ITGA5|0.73;STT3A|0.73…	106	21020	109	35391	http://www.ebi.ac.uk/QuickGO/GTerm?id=GO:0043226
2	2	membrane-enclosed lumen	GO:0031974	4.65×10-20	2.17×10-18	GTF2F1|1.8;PSMA1|1.74;SRRM1|1.69;S100A11|1.58;SRI|1.57;PPP1R12A|1.54;MRPL21|0.74;AIFM1|0.74;MUT|0.74;PDHA1|0.74;SMARCA4|0.74;OAT|0.73;FKBP10|0.73;ACP2|0.73;DLD|0.73;HDAC2|0.73;GNS|0.73;SLTM|0.73;NARS2|0.72;SERPINH1|0.72;DHX30|0.72;GLS|0.72;TRRAP|0.72;TUFM|0.71;NDUFA10|0.71;C1QBP|0.7;LSG1|0.7;SMARCA5|0.7;CTSS|0.7;NDUFA13|0.7;CARS2|0.7;CSPG4|0.69;CDK1|0.69;DNAJA3|0.69;PNPT1|0.69;HNRNPR|0.69;HYOU1|0…	62	6270	109	35391	http://www.ebi.ac.uk/QuickGO/GTerm?id=GO:0031974
4	4	cytoplasm	GO:0005737	5.67×10-20	2.38×10-18	NDRG1|1.88;CDKN2A|1.86;PSMA1|1.74;GIGYF2|1.72;SLK|1.69;SRRM1|1.69;STMN1|1.67;CLIP1|1.66;TMEM109|1.61;DBNL|1.6;S100A11|1.58;SRI|1.57;PPP1R12A|1.54;UBE2K|1.53;S100A6|1.52;DDOST|0.74;SFXN3|0.74;LPCAT1|0.74;SLC25A1|0.74;MRPL21|0.74;TECR|0.74;ATP6V0D1|0.74;AIFM1|0.74;MUT|0.74;PDHA1|0.74;OAT|0.73;FKBP10|0.73;BSG|0.73;ACP2|0.73;DLD|0.73;ITGA5|0.73;STT3A|0.73;SSR1|0.73;HDAC2|0.73;GNS|0.73;ECH1|0.72;MRPL5…	96	16385	109	35391	http://www.ebi.ac.uk/QuickGO/GTerm?id=GO:0005737
5	4,5	intracellular membrane-bounded organelle	GO:0043231	7.73×10-20	2.95×10-18	NDRG1|1.88;CDKN2A|1.86;GTF2F1|1.8;PSMA1|1.74;SRRM1|1.69;CLIP1|1.66;TMEM109|1.61;DBNL|1.6;S100A11|1.58;SRI|1.57;PPP1R12A|1.54;UBE2K|1.53;S100A6|1.52;DDOST|0.74;SFXN3|0.74;LPCAT1|0.74;SLC25A1|0.74;MRPL21|0.74;TECR|0.74;ATP6V0D1|0.74;AIFM1|0.74;MUT|0.74;PDHA1|0.74;SMARCA4|0.74;OAT|0.73;FKBP10|0.73;BSG|0.73;ACP2|0.73;DLD|0.73;ITGA5|0.73;STT3A|0.73;SSR1|0.73;HDAC2|0.73;GNS|0.73;SLTM|0.73;ECH1|0.72;MRP…	98	17288	109	35391	http://www.ebi.ac.uk/QuickGO/GTerm?id=GO:0043231
5	4,5	intracellular organelle lumen	GO:0070013	6.32×10-19	2.21×10-17	GTF2F1|1.8;PSMA1|1.74;SRRM1|1.69;S100A11|1.58;SRI|1.57;PPP1R12A|1.54;MRPL21|0.74;MUT|0.74;PDHA1|0.74;SMARCA4|0.74;OAT|0.73;FKBP10|0.73;ACP2|0.73;DLD|0.73;HDAC2|0.73;GNS|0.73;SLTM|0.73;NARS2|0.72;SERPINH1|0.72;DHX30|0.72;GLS|0.72;TRRAP|0.72;TUFM|0.71;NDUFA10|0.71;C1QBP|0.7;LSG1|0.7;SMARCA5|0.7;CTSS|0.7;NDUFA13|0.7;CARS2|0.7;CSPG4|0.69;CDK1|0.69;DNAJA3|0.69;HNRNPR|0.69;HYOU1|0.69;TOP1|0.68;POLDIP2|…	60	6150	109	35391	http://www.ebi.ac.uk/QuickGO/GTerm?id=GO:0070013
3	3	organelle lumen	GO:0043233	9.87×10-19	3.19×10-17	GTF2F1|1.8;PSMA1|1.74;SRRM1|1.69;S100A11|1.58;SRI|1.57;PPP1R12A|1.54;MRPL21|0.74;MUT|0.74;PDHA1|0.74;SMARCA4|0.74;OAT|0.73;FKBP10|0.73;ACP2|0.73;DLD|0.73;HDAC2|0.73;GNS|0.73;SLTM|0.73;NARS2|0.72;SERPINH1|0.72;DHX30|0.72;GLS|0.72;TRRAP|0.72;TUFM|0.71;NDUFA10|0.71;C1QBP|0.7;LSG1|0.7;SMARCA5|0.7;CTSS|0.7;NDUFA13|0.7;CARS2|0.7;CSPG4|0.69;CDK1|0.69;DNAJA3|0.69;HNRNPR|0.69;HYOU1|0.69;TOP1|0.68;POLDIP2|…	60	6205	109	35391	http://www.ebi.ac.uk/QuickGO/GTerm?id=GO:0043233
4	4	extracellular membrane-bounded organelle	GO:0065010	1.40×10-16	3.92×10-15	NDRG1|1.88;PSMA1|1.74;SLK|1.69;STMN1|1.67;TMEM109|1.61;DBNL|1.6;S100A11|1.58;SRI|1.57;UBE2K|1.53;S100A6|1.52;TAGLN2|1.51;SLC25A1|0.74;ATP6V0D1|0.74;APMAP|0.74;BSG|0.73;ACP2|0.73;ALCAM|0.73;GNS|0.73;ECH1|0.72;ATP5L|0.72;SERPINH1|0.72;TUFM|0.71;NDUFA13|0.7;CSPG4|0.69;CDK1|0.69;ATP1B1|0.69;HYOU1|0.69;MDH2|0.68;CS|0.68;PHB2|0.67;PDHB|0.67;MYDGF|0.65;ITGB4|0.65;GANAB|0.64;SLC7A5|0.63;SERINC1|0.62;PCYO…	39	2772	109	35391	http://www.ebi.ac.uk/QuickGO/GTerm?id=GO:0065010
4	4	extracellular exosome	GO:0070062	1.40×10-16	3.92×10-15	NDRG1|1.88;PSMA1|1.74;SLK|1.69;STMN1|1.67;TMEM109|1.61;DBNL|1.6;S100A11|1.58;SRI|1.57;UBE2K|1.53;S100A6|1.52;TAGLN2|1.51;SLC25A1|0.74;ATP6V0D1|0.74;APMAP|0.74;BSG|0.73;ACP2|0.73;ALCAM|0.73;GNS|0.73;ECH1|0.72;ATP5L|0.72;SERPINH1|0.72;TUFM|0.71;NDUFA13|0.7;CSPG4|0.69;CDK1|0.69;ATP1B1|0.69;HYOU1|0.69;MDH2|0.68;CS|0.68;PHB2|0.67;PDHB|0.67;MYDGF|0.65;ITGB4|0.65;GANAB|0.64;SLC7A5|0.63;SERINC1|0.62;PCYO…	39	2772	109	35391	http://www.ebi.ac.uk/QuickGO/GTerm?id=GO:0070062
3	3	extracellular organelle	GO:0043230	1.64×10-16	3.96×10-15	NDRG1|1.88;PSMA1|1.74;SLK|1.69;STMN1|1.67;TMEM109|1.61;DBNL|1.6;S100A11|1.58;SRI|1.57;UBE2K|1.53;S100A6|1.52;TAGLN2|1.51;SLC25A1|0.74;ATP6V0D1|0.74;APMAP|0.74;BSG|0.73;ACP2|0.73;ALCAM|0.73;GNS|0.73;ECH1|0.72;ATP5L|0.72;SERPINH1|0.72;TUFM|0.71;NDUFA13|0.7;CSPG4|0.69;CDK1|0.69;ATP1B1|0.69;HYOU1|0.69;MDH2|0.68;CS|0.68;PHB2|0.67;PDHB|0.67;MYDGF|0.65;ITGB4|0.65;GANAB|0.64;SLC7A5|0.63;SERINC1|0.62;PCYO…	39	2785	109	35391	http://www.ebi.ac.uk/QuickGO/GTerm?id=GO:0043230
3	3	extracellular vesicle	GO:1903561	1.64×10-16	3.96×10-15	NDRG1|1.88;PSMA1|1.74;SLK|1.69;STMN1|1.67;TMEM109|1.61;DBNL|1.6;S100A11|1.58;SRI|1.57;UBE2K|1.53;S100A6|1.52;TAGLN2|1.51;SLC25A1|0.74;ATP6V0D1|0.74;APMAP|0.74;BSG|0.73;ACP2|0.73;ALCAM|0.73;GNS|0.73;ECH1|0.72;ATP5L|0.72;SERPINH1|0.72;TUFM|0.71;NDUFA13|0.7;CSPG4|0.69;CDK1|0.69;ATP1B1|0.69;HYOU1|0.69;MDH2|0.68;CS|0.68;PHB2|0.67;PDHB|0.67;MYDGF|0.65;ITGB4|0.65;GANAB|0.64;SLC7A5|0.63;SERINC1|0.62;PCYO…	39	2785	109	35391	http://www.ebi.ac.uk/QuickGO/GTerm?id=GO:1903561
4	3,4	intracellular organelle	GO:0043229	1.70×10-16	3.96×10-15	NDRG1|1.88;CDKN2A|1.86;GTF2F1|1.8;PSMA1|1.74;SRRM1|1.69;STMN1|1.67;CLIP1|1.66;TMEM109|1.61;DBNL|1.6;S100A11|1.58;SRI|1.57;PPP1R12A|1.54;UBE2K|1.53;S100A6|1.52;DDOST|0.74;SFXN3|0.74;LPCAT1|0.74;SLC25A1|0.74;MRPL21|0.74;TECR|0.74;ATP6V0D1|0.74;AIFM1|0.74;MUT|0.74;PDHA1|0.74;SMARCA4|0.74;OAT|0.73;FKBP10|0.73;BSG|0.73;ACP2|0.73;DLD|0.73;ITGA5|0.73;STT3A|0.73;SSR1|0.73;HDAC2|0.73;GNS|0.73;SLTM|0.73;EC…	100	19807	109	35391	http://www.ebi.ac.uk/QuickGO/GTerm?id=GO:0043229
3	3	vesicle	GO:0031982	5.60×10-15	1.24×10-13	NDRG1|1.88;PSMA1|1.74;SLK|1.69;STMN1|1.67;CLIP1|1.66;TMEM109|1.61;DBNL|1.6;S100A11|1.58;SRI|1.57;UBE2K|1.53;S100A6|1.52;TAGLN2|1.51;SLC25A1|0.74;ATP6V0D1|0.74;APMAP|0.74;BSG|0.73;ACP2|0.73;DLD|0.73;ALCAM|0.73;ITGA5|0.73;GNS|0.73;ECH1|0.72;ATP5L|0.72;SERPINH1|0.72;TUFM|0.71;CYBA|0.7;NDUFA13|0.7;CSPG4|0.69;CDK1|0.69;ATP1B1|0.69;HYOU1|0.69;MDH2|0.68;CS|0.68;PHB2|0.67;PDHB|0.67;MYDGF|0.65;ITGB4|0.65;…	44	3987	109	35391	http://www.ebi.ac.uk/QuickGO/GTerm?id=GO:0031982
4	4	membrane-bounded vesicle	GO:0031988	9.05×10-15	1.90×10-13	NDRG1|1.88;PSMA1|1.74;SLK|1.69;STMN1|1.67;CLIP1|1.66;TMEM109|1.61;DBNL|1.6;S100A11|1.58;SRI|1.57;UBE2K|1.53;S100A6|1.52;TAGLN2|1.51;SLC25A1|0.74;ATP6V0D1|0.74;APMAP|0.74;BSG|0.73;ACP2|0.73;DLD|0.73;ALCAM|0.73;GNS|0.73;ECH1|0.72;ATP5L|0.72;SERPINH1|0.72;TUFM|0.71;CYBA|0.7;NDUFA13|0.7;CSPG4|0.69;CDK1|0.69;ATP1B1|0.69;HYOU1|0.69;MDH2|0.68;CS|0.68;PHB2|0.67;PDHB|0.67;MYDGF|0.65;ITGB4|0.65;GANAB|0.64;…	43	3854	109	35391	http://www.ebi.ac.uk/QuickGO/GTerm?id=GO:0031988
3	3	organelle membrane	GO:0031090	3.74×10-13	7.48×10-12	NDRG1|1.88;CLIP1|1.66;TMEM109|1.61;DBNL|1.6;SRI|1.57;DDOST|0.74;SFXN3|0.74;LPCAT1|0.74;SLC25A1|0.74;MRPL21|0.74;TECR|0.74;ATP6V0D1|0.74;AIFM1|0.74;FKBP10|0.73;BSG|0.73;ACP2|0.73;STT3A|0.73;SSR1|0.73;MRPL54|0.72;ATP5L|0.72;MLEC|0.71;HM13|0.71;PTPMT1|0.71;NDUFA10|0.71;CYBA|0.7;NDUFA13|0.7;NUP210|0.69;ERLIN1|0.69;CYB5B|0.69;MDH2|0.68;AURKAIP1|0.68;SEC62|0.68;PHB2|0.67;CLPX|0.67;ASPH|0.63;SERINC1|0.6…	42	4093	109	35391	http://www.ebi.ac.uk/QuickGO/GTerm?id=GO:0031090
2	2	extracellular region part	GO:0044421	8.55×10-13	1.63×10-11	NDRG1|1.88;PSMA1|1.74;SLK|1.69;STMN1|1.67;TMEM109|1.61;DBNL|1.6;S100A11|1.58;SRI|1.57;UBE2K|1.53;S100A6|1.52;TAGLN2|1.51;SLC25A1|0.74;ATP6V0D1|0.74;APMAP|0.74;SMARCA4|0.74;BSG|0.73;ACP2|0.73;ALCAM|0.73;GNS|0.73;ECH1|0.72;ATP5L|0.72;SERPINH1|0.72;TUFM|0.71;C1QBP|0.7;CTSS|0.7;NDUFA13|0.7;CSPG4|0.69;CDK1|0.69;ATP1B1|0.69;HYOU1|0.69;MDH2|0.68;CS|0.68;PHB2|0.67;PDHB|0.67;MYDGF|0.65;ITGB4|0.65;GANAB|0.…	42	4195	109	35391	http://www.ebi.ac.uk/QuickGO/GTerm?id=GO:0044421
3	3	intracellular part	GO:0044424	6.36×10-11	1.16×10-9	NDRG1|1.88;CDKN2A|1.86;GTF2F1|1.8;PSMA1|1.74;GIGYF2|1.72;SLK|1.69;SRRM1|1.69;STMN1|1.67;CLIP1|1.66;TMEM109|1.61;DBNL|1.6;S100A11|1.58;SRI|1.57;PPP1R12A|1.54;UBE2K|1.53;S100A6|1.52;DDOST|0.74;SFXN3|0.74;LPCAT1|0.74;SLC25A1|0.74;MRPL21|0.74;TECR|0.74;ATP6V0D1|0.74;AIFM1|0.74;MUT|0.74;PDHA1|0.74;SMARCA4|0.74;OAT|0.73;FKBP10|0.73;BSG|0.73;ACP2|0.73;DLD|0.73;ITGA5|0.73;STT3A|0.73;SSR1|0.73;HDAC2|0.73;…	102	23961	109	35391	http://www.ebi.ac.uk/QuickGO/GTerm?id=GO:0044424
2	2	extracellular region	GO:0005576	1.92×10-9	3.37×10-8	NDRG1|1.88;PSMA1|1.74;SLK|1.69;STMN1|1.67;TMEM109|1.61;DBNL|1.6;S100A11|1.58;SRI|1.57;UBE2K|1.53;S100A6|1.52;TAGLN2|1.51;SLC25A1|0.74;ATP6V0D1|0.74;APMAP|0.74;SMARCA4|0.74;BSG|0.73;ACP2|0.73;ALCAM|0.73;GNS|0.73;ECH1|0.72;ATP5L|0.72;SERPINH1|0.72;TUFM|0.71;C1QBP|0.7;CTSS|0.7;NDUFA13|0.7;CSPG4|0.69;CDK1|0.69;ATP1B1|0.69;HYOU1|0.69;MDH2|0.68;CS|0.68;PHB2|0.67;PDHB|0.67;MYDGF|0.65;ITGB4|0.65;GANAB|0.…	42	5333	109	35391	http://www.ebi.ac.uk/QuickGO/GTerm?id=GO:0005576
5	4,5	endoplasmic reticulum part	GO:0044432	3.02×10-9	5.08×10-8	TMEM109|1.61;SRI|1.57;DDOST|0.74;LPCAT1|0.74;TECR|0.74;FKBP10|0.73;STT3A|0.73;SSR1|0.73;SERPINH1|0.72;MLEC|0.71;HM13|0.71;CYBA|0.7;NUP210|0.69;ERLIN1|0.69;HYOU1|0.69;SEC62|0.68;MYDGF|0.65;GANAB|0.64;ASPH|0.63;SERINC1|0.62;ERO1L|0.58	21	1449	109	35391	http://www.ebi.ac.uk/QuickGO/GTerm?id=GO:0044432
5	4,5	organelle envelope	GO:0031967	4.18×10-9	6.75×10-8	TMEM109|1.61;S100A6|1.52;SFXN3|0.74;SLC25A1|0.74;MRPL21|0.74;AIFM1|0.74;MRPL54|0.72;ATP5L|0.72;PTPMT1|0.71;NDUFA10|0.71;NDUFA13|0.7;NUP210|0.69;CYB5B|0.69;PNPT1|0.69;MDH2|0.68;AURKAIP1|0.68;PHB2|0.67;CLPX|0.67;PARP1|0.66;TMPO|0.61;GSTK1|0.56	21	1476	109	35391	http://www.ebi.ac.uk/QuickGO/GTerm?id=GO:0031967
3	3	envelope	GO:0031975	4.38×10-9	6.82×10-8	TMEM109|1.61;S100A6|1.52;SFXN3|0.74;SLC25A1|0.74;MRPL21|0.74;AIFM1|0.74;MRPL54|0.72;ATP5L|0.72;PTPMT1|0.71;NDUFA10|0.71;NDUFA13|0.7;NUP210|0.69;CYB5B|0.69;PNPT1|0.69;MDH2|0.68;AURKAIP1|0.68;PHB2|0.67;CLPX|0.67;PARP1|0.66;TMPO|0.61;GSTK1|0.56	21	1480	109	35391	http://www.ebi.ac.uk/QuickGO/GTerm?id=GO:0031975
2	2	nucleoid	GO:0009295	6.29×10-9	9.44×10-8	DHX30|0.72;TUFM|0.71;DNAJA3|0.69;POLDIP2|0.68;CLPX|0.67;TOP2A|0.6	6	46	109	35391	http://www.ebi.ac.uk/QuickGO/GTerm?id=GO:0009295
6	5,6	mitochondrial envelope	GO:0005740	1.90×10-8	2.76×10-7	SFXN3|0.74;SLC25A1|0.74;MRPL21|0.74;AIFM1|0.74;MRPL54|0.72;ATP5L|0.72;PTPMT1|0.71;NDUFA10|0.71;NDUFA13|0.7;CYB5B|0.69;PNPT1|0.69;MDH2|0.68;AURKAIP1|0.68;PHB2|0.67;CLPX|0.67;GSTK1|0.56	16	905	109	35391	http://www.ebi.ac.uk/QuickGO/GTerm?id=GO:0005740
6	4,5,6	endoplasmic reticulum	GO:0005783	2.89×10-8	4.04×10-7	TMEM109|1.61;SRI|1.57;DDOST|0.74;LPCAT1|0.74;TECR|0.74;FKBP10|0.73;ITGA5|0.73;STT3A|0.73;SSR1|0.73;SERPINH1|0.72;MLEC|0.71;HM13|0.71;CYBA|0.7;LSG1|0.7;NUP210|0.69;ERLIN1|0.69;HYOU1|0.69;SEC62|0.68;MYDGF|0.65;GANAB|0.64;NCEH1|0.63;ASPH|0.63;SERINC1|0.62;ERO1L|0.58	24	2144	109	35391	http://www.ebi.ac.uk/QuickGO/GTerm?id=GO:0005783
3	3	intracellular	GO:0005622	3.23×10-8	4.38×10-7	NDRG1|1.88;CDKN2A|1.86;GTF2F1|1.8;PSMA1|1.74;GIGYF2|1.72;SLK|1.69;SRRM1|1.69;STMN1|1.67;CLIP1|1.66;TMEM109|1.61;DBNL|1.6;S100A11|1.58;SRI|1.57;PPP1R12A|1.54;UBE2K|1.53;S100A6|1.52;DDOST|0.74;SFXN3|0.74;LPCAT1|0.74;SLC25A1|0.74;MRPL21|0.74;TECR|0.74;ATP6V0D1|0.74;AIFM1|0.74;MUT|0.74;PDHA1|0.74;SMARCA4|0.74;OAT|0.73;FKBP10|0.73;BSG|0.73;ACP2|0.73;DLD|0.73;ITGA5|0.73;STT3A|0.73;SSR1|0.73;HDAC2|0.73;…	103	26275	109	35391	http://www.ebi.ac.uk/QuickGO/GTerm?id=GO:0005622
4	4	organelle inner membrane	GO:0019866	4.40×10-8	5.66×10-7	SLC25A1|0.74;MRPL21|0.74;AIFM1|0.74;MRPL54|0.72;ATP5L|0.72;PTPMT1|0.71;NDUFA10|0.71;NDUFA13|0.7;MDH2|0.68;AURKAIP1|0.68;PHB2|0.67;CLPX|0.67;TMPO|0.61;GSTK1|0.56	14	713	109	35391	http://www.ebi.ac.uk/QuickGO/GTerm?id=GO:0019866
5	5	mitochondrial inner membrane	GO:0005743	4.44×10-8	5.66×10-7	SLC25A1|0.74;MRPL21|0.74;AIFM1|0.74;MRPL54|0.72;ATP5L|0.72;PTPMT1|0.71;NDUFA10|0.71;NDUFA13|0.7;MDH2|0.68;AURKAIP1|0.68;PHB2|0.67;CLPX|0.67;GSTK1|0.56	13	600	109	35391	http://www.ebi.ac.uk/QuickGO/GTerm?id=GO:0005743
7	4,6,7	mitochondrial membrane	GO:0031966	5.64×10-8	6.97×10-7	SFXN3|0.74;SLC25A1|0.74;MRPL21|0.74;AIFM1|0.74;MRPL54|0.72;ATP5L|0.72;PTPMT1|0.71;NDUFA10|0.71;NDUFA13|0.7;CYB5B|0.69;MDH2|0.68;AURKAIP1|0.68;PHB2|0.67;CLPX|0.67;GSTK1|0.56	15	850	109	35391	http://www.ebi.ac.uk/QuickGO/GTerm?id=GO:0031966
3	3	endomembrane system	GO:0012505	1.20×10-7	1.44×10-6	NDRG1|1.88;CLIP1|1.66;TMEM109|1.61;DBNL|1.6;SRI|1.57;S100A6|1.52;DDOST|0.74;LPCAT1|0.74;TECR|0.74;ATP6V0D1|0.74;FKBP10|0.73;BSG|0.73;DLD|0.73;ITGA5|0.73;STT3A|0.73;SSR1|0.73;SERPINH1|0.72;TRRAP|0.72;MLEC|0.71;HM13|0.71;CYBA|0.7;LSG1|0.7;CTSS|0.7;CSPG4|0.69;NUP210|0.69;ERLIN1|0.69;HYOU1|0.69;SEC62|0.68;PARP1|0.66;MYDGF|0.65;GANAB|0.64;NCEH1|0.63;ASPH|0.63;SERINC1|0.62;GOLIM4|0.62;TMPO|0.61;ERO1L|0…	38	5192	109	35391	http://www.ebi.ac.uk/QuickGO/GTerm?id=GO:0012505
7	3,5,6,7	mitochondrial nucleoid	GO:0042645	1.53×10-7	1.78×10-6	DHX30|0.72;TUFM|0.71;DNAJA3|0.69;POLDIP2|0.68;CLPX|0.67	5	40	109	35391	http://www.ebi.ac.uk/QuickGO/GTerm?id=GO:0042645
4	4	bounding membrane of organelle	GO:0098588	4.90×10-7	5.56×10-6	NDRG1|1.88;TMEM109|1.61;DBNL|1.6;SRI|1.57;DDOST|0.74;LPCAT1|0.74;TECR|0.74;ATP6V0D1|0.74;FKBP10|0.73;BSG|0.73;ACP2|0.73;STT3A|0.73;SSR1|0.73;MLEC|0.71;HM13|0.71;CYBA|0.7;NUP210|0.69;ERLIN1|0.69;CYB5B|0.69;SEC62|0.68;PHB2|0.67;ASPH|0.63;SERINC1|0.62;GOLIM4|0.62;PCYOX1|0.61;ERO1L|0.58;HSD17B4|0.54	27	3080	109	35391	http://www.ebi.ac.uk/QuickGO/GTerm?id=GO:0098588
4	3,4	endoplasmic reticulum membrane	GO:0005789	1.54×10-6	1.71×10-5	TMEM109|1.61;SRI|1.57;DDOST|0.74;LPCAT1|0.74;TECR|0.74;FKBP10|0.73;STT3A|0.73;SSR1|0.73;MLEC|0.71;HM13|0.71;NUP210|0.69;ERLIN1|0.69;SEC62|0.68;ASPH|0.63;SERINC1|0.62;ERO1L|0.58	16	1256	109	35391	http://www.ebi.ac.uk/QuickGO/GTerm?id=GO:0005789
2	2	cell part	GO:0044464	1.60×10-6	1.72×10-5	NDRG1|1.88;CDKN2A|1.86;GTF2F1|1.8;PSMA1|1.74;GIGYF2|1.72;SLK|1.69;SRRM1|1.69;STMN1|1.67;CLIP1|1.66;TMEM109|1.61;DBNL|1.6;S100A11|1.58;SRI|1.57;PPP1R12A|1.54;UBE2K|1.53;S100A6|1.52;DDOST|0.74;SFXN3|0.74;LPCAT1|0.74;SLC25A1|0.74;MRPL21|0.74;TECR|0.74;ATP6V0D1|0.74;AIFM1|0.74;APMAP|0.74;MUT|0.74;PDHA1|0.74;SMARCA4|0.74;OAT|0.73;FKBP10|0.73;BSG|0.73;ACP2|0.73;DLD|0.73;ALCAM|0.73;ITGA5|0.73;STT3A|0.73…	107	29797	109	35391	http://www.ebi.ac.uk/QuickGO/GTerm?id=GO:0044464
3	3	nuclear outer membrane-endoplasmic reticulum membrane network	GO:0042175	1.95×10-6	2.05×10-5	TMEM109|1.61;SRI|1.57;DDOST|0.74;LPCAT1|0.74;TECR|0.74;FKBP10|0.73;STT3A|0.73;SSR1|0.73;MLEC|0.71;HM13|0.71;NUP210|0.69;ERLIN1|0.69;SEC62|0.68;ASPH|0.63;SERINC1|0.62;ERO1L|0.58	16	1279	109	35391	http://www.ebi.ac.uk/QuickGO/GTerm?id=GO:0042175
6	5,6	endoplasmic reticulum lumen	GO:0005788	2.57×10-6	2.63×10-5	FKBP10|0.73;SERPINH1|0.72;HYOU1|0.69;MYDGF|0.65;GANAB|0.64;ASPH|0.63;ERO1L|0.58	7	195	109	35391	http://www.ebi.ac.uk/QuickGO/GTerm?id=GO:0005788
6	4,5,6	pyruvate dehydrogenase complex	GO:0045254	3.36×10-6	3.36×10-5	PDHA1|0.74;DLD|0.73;PDHB|0.67	3	10	109	35391	http://www.ebi.ac.uk/QuickGO/GTerm?id=GO:0045254
2	2	cell	GO:0005623	3.70×10-6	3.62×10-5	NDRG1|1.88;CDKN2A|1.86;GTF2F1|1.8;PSMA1|1.74;GIGYF2|1.72;SLK|1.69;SRRM1|1.69;STMN1|1.67;CLIP1|1.66;TMEM109|1.61;DBNL|1.6;S100A11|1.58;SRI|1.57;PPP1R12A|1.54;UBE2K|1.53;S100A6|1.52;DDOST|0.74;SFXN3|0.74;LPCAT1|0.74;SLC25A1|0.74;MRPL21|0.74;TECR|0.74;ATP6V0D1|0.74;AIFM1|0.74;APMAP|0.74;MUT|0.74;PDHA1|0.74;SMARCA4|0.74;OAT|0.73;FKBP10|0.73;BSG|0.73;ACP2|0.73;DLD|0.73;ALCAM|0.73;ITGA5|0.73;STT3A|0.73…	107	30056	109	35391	http://www.ebi.ac.uk/QuickGO/GTerm?id=GO:0005623
2	2	membrane	GO:0016020	4.00×10-6	3.81×10-5	NDRG1|1.88;GIGYF2|1.72;STMN1|1.67;CLIP1|1.66;TMEM109|1.61;DBNL|1.6;SRI|1.57;S100A6|1.52;DDOST|0.74;SFXN3|0.74;LPCAT1|0.74;SLC25A1|0.74;MRPL21|0.74;TECR|0.74;ATP6V0D1|0.74;AIFM1|0.74;APMAP|0.74;SMARCA4|0.74;FKBP10|0.73;BSG|0.73;ACP2|0.73;ALCAM|0.73;ITGA5|0.73;STT3A|0.73;SSR1|0.73;ECH1|0.72;MRPL54|0.72;ATP5L|0.72;SERPINH1|0.72;TUFM|0.71;MLEC|0.71;HM13|0.71;PTPMT1|0.71;KIF2A|0.71;NDUFA10|0.71;C1QBP|…	71	15374	109	35391	http://www.ebi.ac.uk/QuickGO/GTerm?id=GO:0016020
3	3	oxidoreductase complex	GO:1990204	4.40×10-6	4.11×10-5	PDHA1|0.74;DLD|0.73;NDUFA10|0.71;CYBA|0.7;NDUFA13|0.7;PDHB|0.67	6	137	109	35391	http://www.ebi.ac.uk/QuickGO/GTerm?id=GO:1990204
2	2	macromolecular complex	GO:0032991	4.91×10-6	4.48×10-5	NDRG1|1.88;CDKN2A|1.86;GTF2F1|1.8;PSMA1|1.74;SRRM1|1.69;STMN1|1.67;CLIP1|1.66;DBNL|1.6;PPP1R12A|1.54;DDOST|0.74;MRPL21|0.74;ATP6V0D1|0.74;PDHA1|0.74;SMARCA4|0.74;DLD|0.73;ITGA5|0.73;STT3A|0.73;HDAC2|0.73;MRPL54|0.72;ATP5L|0.72;YBX3|0.72;TRRAP|0.72;KIF2A|0.71;NDUFA10|0.71;CYBA|0.7;SMARCA5|0.7;NDUFA13|0.7;NUP210|0.69;ERLIN1|0.69;CDK1|0.69;ATP1B1|0.69;DNAJA3|0.69;PNPT1|0.69;HNRNPR|0.69;HYOU1|0.69;US…	48	8598	109	35391	http://www.ebi.ac.uk/QuickGO/GTerm?id=GO:0032991
3	3	myelin sheath	GO:0043209	1.51×10-5	1.35×10-4	NDRG1|1.88;PDHA1|0.74;DLD|0.73;NDUFA10|0.71;ATP1B1|0.69;MDH2|0.68	6	170	109	35391	http://www.ebi.ac.uk/QuickGO/GTerm?id=GO:0043209
3	3	whole membrane	GO:0098805	2.60×10-5	2.27×10-4	NDRG1|1.88;TMEM109|1.61;DBNL|1.6;SRI|1.57;ATP6V0D1|0.74;BSG|0.73;ACP2|0.73;ITGA5|0.73;SERPINH1|0.72;CYBA|0.7;CSPG4|0.69;ATP1B1|0.69;DNAJA3|0.69;CYB5B|0.69;PHB2|0.67;ITGB4|0.65;SLC7A5|0.63;GOLIM4|0.62;PCYOX1|0.61;HSD17B4|0.54;CD44|0.47	21	2525	109	35391	http://www.ebi.ac.uk/QuickGO/GTerm?id=GO:0098805
5	4,5	nuclear part	GO:0044428	2.72×10-5	2.33×10-4	GTF2F1|1.8;PSMA1|1.74;SRRM1|1.69;TMEM109|1.61;S100A11|1.58;SRI|1.57;PPP1R12A|1.54;S100A6|1.52;SMARCA4|0.74;DLD|0.73;HDAC2|0.73;SLTM|0.73;TRRAP|0.72;C1QBP|0.7;LSG1|0.7;SMARCA5|0.7;NDUFA13|0.7;NUP210|0.69;CDK1|0.69;HNRNPR|0.69;USP39|0.69;TOP1|0.68;ETHE1|0.68;MDH2|0.68;AURKAIP1|0.68;PHB2|0.67;CLPX|0.67;FUS|0.67;PDHB|0.67;PARP1|0.66;SLC7A5|0.63;GOLIM4|0.62;TMPO|0.61;TOP2A|0.6;BMS1|0.54;EWSR1|0.53;SSR…	37	6207	109	35391	http://www.ebi.ac.uk/QuickGO/GTerm?id=GO:0044428
3	3	cell-substrate junction	GO:0030055	6.81×10-5	5.72×10-4	PPP1R12A|1.54;BSG|0.73;ALCAM|0.73;ITGA5|0.73;CSPG4|0.69;HYOU1|0.69;ITGB4|0.65;CD44|0.47	8	440	109	35391	http://www.ebi.ac.uk/QuickGO/GTerm?id=GO:0030055
6	5,6	nucleoplasm	GO:0005654	8.01×10-5	6.60×10-4	GTF2F1|1.8;PSMA1|1.74;SRRM1|1.69;S100A11|1.58;SRI|1.57;PPP1R12A|1.54;SMARCA4|0.74;DLD|0.73;HDAC2|0.73;SLTM|0.73;TRRAP|0.72;LSG1|0.7;SMARCA5|0.7;NDUFA13|0.7;CDK1|0.69;HNRNPR|0.69;TOP1|0.68;ETHE1|0.68;MDH2|0.68;AURKAIP1|0.68;CLPX|0.67;FUS|0.67;PDHB|0.67;PARP1|0.66;GOLIM4|0.62;TOP2A|0.6;EWSR1|0.53;SSRP1|0.5	28	4293	109	35391	http://www.ebi.ac.uk/QuickGO/GTerm?id=GO:0005654
9	6,7,8,9	lysosomal lumen	GO:0043202	9.21×10-5	7.38×10-4	ACP2|0.73;GNS|0.73;CTSS|0.7;CSPG4|0.69	4	76	109	35391	http://www.ebi.ac.uk/QuickGO/GTerm?id=GO:0043202
3	3	cell leading edge	GO:0031252	9.32×10-5	7.38×10-4	CLIP1|1.66;DBNL|1.6;S100A11|1.58;S100A6|1.52;ITGA5|0.73;CSPG4|0.69;ITGB4|0.65	7	341	109	35391	http://www.ebi.ac.uk/QuickGO/GTerm?id=GO:0031252
7	5,6,7	vacuolar lumen	GO:0005775	1.12×10-4	8.75×10-4	ACP2|0.73;GNS|0.73;CTSS|0.7;CSPG4|0.69	4	80	109	35391	http://www.ebi.ac.uk/QuickGO/GTerm?id=GO:0005775
2	2	cell junction	GO:0030054	1.20×10-4	9.16×10-4	NDRG1|1.88;GTF2F1|1.8;DBNL|1.6;PPP1R12A|1.54;BSG|0.73;ALCAM|0.73;ITGA5|0.73;YBX3|0.72;CSPG4|0.69;ATP1B1|0.69;DNAJA3|0.69;HYOU1|0.69;ITGB4|0.65;CD44|0.47	14	1420	109	35391	http://www.ebi.ac.uk/QuickGO/GTerm?id=GO:0030054
4	4	ruffle	GO:0001726	1.30×10-4	9.74×10-4	CLIP1|1.66;DBNL|1.6;S100A11|1.58;S100A6|1.52;ITGA5|0.73	5	157	109	35391	http://www.ebi.ac.uk/QuickGO/GTerm?id=GO:0001726
3	3	cell projection	GO:0042995	1.58×10-4	1.17×10-3	STMN1|1.67;CLIP1|1.66;DBNL|1.6;S100A11|1.58;SRI|1.57;UBE2K|1.53;S100A6|1.52;ATP6V0D1|0.74;ACP2|0.73;DLD|0.73;ALCAM|0.73;ITGA5|0.73;KIF2A|0.71;CYBA|0.7;CSPG4|0.69;FUS|0.67;ACAD9|0.64	17	2032	109	35391	http://www.ebi.ac.uk/QuickGO/GTerm?id=GO:0042995
6	5,6	nuclear lumen	GO:0031981	1.63×10-4	1.18×10-3	GTF2F1|1.8;PSMA1|1.74;SRRM1|1.69;S100A11|1.58;SRI|1.57;PPP1R12A|1.54;SMARCA4|0.74;DLD|0.73;HDAC2|0.73;SLTM|0.73;TRRAP|0.72;C1QBP|0.7;LSG1|0.7;SMARCA5|0.7;NDUFA13|0.7;CDK1|0.69;HNRNPR|0.69;TOP1|0.68;ETHE1|0.68;MDH2|0.68;AURKAIP1|0.68;PHB2|0.67;CLPX|0.67;FUS|0.67;PDHB|0.67;PARP1|0.66;SLC7A5|0.63;GOLIM4|0.62;TOP2A|0.6;BMS1|0.54;EWSR1|0.53;SSRP1|0.5	32	5455	109	35391	http://www.ebi.ac.uk/QuickGO/GTerm?id=GO:0031981
3	3	protein complex	GO:0043234	1.90×10-4	1.35×10-3	NDRG1|1.88;GTF2F1|1.8;PSMA1|1.74;STMN1|1.67;CLIP1|1.66;DBNL|1.6;PPP1R12A|1.54;DDOST|0.74;ATP6V0D1|0.74;PDHA1|0.74;SMARCA4|0.74;DLD|0.73;ITGA5|0.73;STT3A|0.73;HDAC2|0.73;ATP5L|0.72;TRRAP|0.72;KIF2A|0.71;NDUFA10|0.71;CYBA|0.7;SMARCA5|0.7;NDUFA13|0.7;NUP210|0.69;ERLIN1|0.69;CDK1|0.69;ATP1B1|0.69;DNAJA3|0.69;PNPT1|0.69;HYOU1|0.69;TOP1|0.68;PHB2|0.67;CLPX|0.67;PDHB|0.67;PARP1|0.66;ITGB4|0.65;GANAB|0.6…	39	7318	109	35391	http://www.ebi.ac.uk/QuickGO/GTerm?id=GO:0043234
5	4,5	intracellular non-membrane-bounded organelle	GO:0043232	2.36×10-4	1.62×10-3	NDRG1|1.88;CDKN2A|1.86;PSMA1|1.74;STMN1|1.67;CLIP1|1.66;DBNL|1.6;SRI|1.57;PPP1R12A|1.54;UBE2K|1.53;LPCAT1|0.74;MRPL21|0.74;ATP6V0D1|0.74;SMARCA4|0.74;HDAC2|0.73;MRPL54|0.72;DHX30|0.72;TRRAP|0.72;TUFM|0.71;KIF2A|0.71;C1QBP|0.7;SMARCA5|0.7;CDK1|0.69;DNAJA3|0.69;HNRNPR|0.69;TOP1|0.68;POLDIP2|0.68;SEC62|0.68;CLPX|0.67;PARP1|0.66;SLC7A5|0.63;TOP2A|0.6;BMS1|0.54;EWSR1|0.53;SSRP1|0.5	34	6074	109	35391	http://www.ebi.ac.uk/QuickGO/GTerm?id=GO:0043232
3	3	non-membrane-bounded organelle	GO:0043228	2.36×10-4	1.62×10-3	NDRG1|1.88;CDKN2A|1.86;PSMA1|1.74;STMN1|1.67;CLIP1|1.66;DBNL|1.6;SRI|1.57;PPP1R12A|1.54;UBE2K|1.53;LPCAT1|0.74;MRPL21|0.74;ATP6V0D1|0.74;SMARCA4|0.74;HDAC2|0.73;MRPL54|0.72;DHX30|0.72;TRRAP|0.72;TUFM|0.71;KIF2A|0.71;C1QBP|0.7;SMARCA5|0.7;CDK1|0.69;DNAJA3|0.69;HNRNPR|0.69;TOP1|0.68;POLDIP2|0.68;SEC62|0.68;CLPX|0.67;PARP1|0.66;SLC7A5|0.63;TOP2A|0.6;BMS1|0.54;EWSR1|0.53;SSRP1|0.5	34	6074	109	35391	http://www.ebi.ac.uk/QuickGO/GTerm?id=GO:0043228
4	4	mitochondrial protein complex	GO:0098798	3.38×10-4	2.29×10-3	ATP5L|0.72;NDUFA10|0.71;NDUFA13|0.7;PNPT1|0.69;CLPX|0.67	5	193	109	35391	http://www.ebi.ac.uk/QuickGO/GTerm?id=GO:0098798
6	5,6	focal adhesion	GO:0005925	3.78×10-4	2.52×10-3	PPP1R12A|1.54;BSG|0.73;ALCAM|0.73;ITGA5|0.73;CSPG4|0.69;HYOU1|0.69;CD44|0.47	7	429	109	35391	http://www.ebi.ac.uk/QuickGO/GTerm?id=GO:0005925
7	4,5,6,7	sarcoplasmic reticulum membrane	GO:0033017	3.92×10-4	2.57×10-3	TMEM109|1.61;SRI|1.57;ASPH|0.63	3	46	109	35391	http://www.ebi.ac.uk/QuickGO/GTerm?id=GO:0033017
4	4	adherens junction	GO:0005912	4.08×10-4	2.61×10-3	NDRG1|1.88;PPP1R12A|1.54;BSG|0.73;ALCAM|0.73;ITGA5|0.73;CSPG4|0.69;HYOU1|0.69;CD44|0.47	8	573	109	35391	http://www.ebi.ac.uk/QuickGO/GTerm?id=GO:0005912
5	4,5	cell-substrate adherens junction	GO:0005924	4.10×10-4	2.61×10-3	PPP1R12A|1.54;BSG|0.73;ALCAM|0.73;ITGA5|0.73;CSPG4|0.69;HYOU1|0.69;CD44|0.47	7	435	109	35391	http://www.ebi.ac.uk/QuickGO/GTerm?id=GO:0005924
4	4	catalytic complex	GO:1902494	4.62×10-4	2.90×10-3	GTF2F1|1.8;PPP1R12A|1.54;DDOST|0.74;PDHA1|0.74;DLD|0.73;STT3A|0.73;HDAC2|0.73;TRRAP|0.72;NDUFA10|0.71;CYBA|0.7;NDUFA13|0.7;ATP1B1|0.69;DNAJA3|0.69;PDHB|0.67	14	1621	109	35391	http://www.ebi.ac.uk/QuickGO/GTerm?id=GO:1902494
5	4,5	polysome	GO:0005844	4.72×10-4	2.92×10-3	PSMA1|1.74;YBX3|0.72;FUS|0.67	3	49	109	35391	http://www.ebi.ac.uk/QuickGO/GTerm?id=GO:0005844
3	3	anchoring junction	GO:0070161	5.47×10-4	3.33×10-3	NDRG1|1.88;PPP1R12A|1.54;BSG|0.73;ALCAM|0.73;ITGA5|0.73;CSPG4|0.69;HYOU1|0.69;CD44|0.47	8	599	109	35391	http://www.ebi.ac.uk/QuickGO/GTerm?id=GO:0070161
3	3	cell surface	GO:0009986	1.14×10-3	6.86×10-3	APMAP|0.74;ALCAM|0.73;ITGA5|0.73;HM13|0.71;C1QBP|0.7;CSPG4|0.69;PHB2|0.67;ITGB4|0.65;CD44|0.47	9	836	109	35391	http://www.ebi.ac.uk/QuickGO/GTerm?id=GO:0009986
7	4,5,6,7	vacuolar part	GO:0044437	1.36×10-3	7.90×10-3	ATP6V0D1|0.74;ACP2|0.73;DLD|0.73;GNS|0.73;CTSS|0.7;CSPG4|0.69;PCYOX1|0.61	7	534	109	35391	http://www.ebi.ac.uk/QuickGO/GTerm?id=GO:0044437
6	5,6	nucleus	GO:0005634	1.36×10-3	7.90×10-3	NDRG1|1.88;CDKN2A|1.86;GTF2F1|1.8;PSMA1|1.74;SRRM1|1.69;TMEM109|1.61;S100A11|1.58;SRI|1.57;PPP1R12A|1.54;UBE2K|1.53;S100A6|1.52;SLC25A1|0.74;TECR|0.74;AIFM1|0.74;PDHA1|0.74;SMARCA4|0.74;DLD|0.73;HDAC2|0.73;SLTM|0.73;YBX3|0.72;TRRAP|0.72;PTPMT1|0.71;C1QBP|0.7;LSG1|0.7;SMARCA5|0.7;NDUFA13|0.7;NUP210|0.69;CDK1|0.69;DNAJA3|0.69;HNRNPR|0.69;USP39|0.69;TOP1|0.68;POLDIP2|0.68;ETHE1|0.68;MDH2|0.68;AURKAI…	50	11224	109	35391	http://www.ebi.ac.uk/QuickGO/GTerm?id=GO:0005634
4	4	SWI/SNF superfamily-type complex	GO:0070603	1.38×10-3	7.90×10-3	SMARCA4|0.74;HDAC2|0.73;TRRAP|0.72;SMARCA5|0.7	4	155	109	35391	http://www.ebi.ac.uk/QuickGO/GTerm?id=GO:0070603
6	4,5,6	oligosaccharyltransferase complex	GO:0008250	1.39×10-3	7.90×10-3	DDOST|0.74;STT3A|0.73	2	18	109	35391	http://www.ebi.ac.uk/QuickGO/GTerm?id=GO:0008250
6	5,6	sarcoplasmic reticulum	GO:0016529	1.51×10-3	8.46×10-3	TMEM109|1.61;SRI|1.57;ASPH|0.63	3	73	109	35391	http://www.ebi.ac.uk/QuickGO/GTerm?id=GO:0016529
6	5,6	cytosol	GO:0005829	1.56×10-3	8.62×10-3	NDRG1|1.88;CDKN2A|1.86;PSMA1|1.74;SRRM1|1.69;STMN1|1.67;CLIP1|1.66;DBNL|1.6;SRI|1.57;PPP1R12A|1.54;S100A6|1.52;AIFM1|0.74;GLS|0.72;KIF2A|0.71;C1QBP|0.7;LSG1|0.7;CARS2|0.7;CDK1|0.69;DNAJA3|0.69;SEC62|0.68;MCCC2|0.64;LARS2|0.64;SLC7A5|0.63	22	3648	109	35391	http://www.ebi.ac.uk/QuickGO/GTerm?id=GO:0005829
6	5,6	centrosome	GO:0005813	1.82×10-3	9.84×10-3	NDRG1|1.88;PSMA1|1.74;CLIP1|1.66;PPP1R12A|1.54;ATP6V0D1|0.74;KIF2A|0.71;CDK1|0.69;TOP2A|0.6	8	723	109	35391	http://www.ebi.ac.uk/QuickGO/GTerm?id=GO:0005813
5	5	sarcoplasm	GO:0016528	1.83×10-3	9.84×10-3	TMEM109|1.61;SRI|1.57;ASPH|0.63	3	78	109	35391	http://www.ebi.ac.uk/QuickGO/GTerm?id=GO:0016528
3	3	membrane region	GO:0098589	2.07×10-3	1.10×10-2	ATP6V0D1|0.74;BSG|0.73;ITGA5|0.73;SERPINH1|0.72;CYBA|0.7;CSPG4|0.69;ATP1B1|0.69;DNAJA3|0.69;ITGB4|0.65;SLC7A5|0.63;CD44|0.47	11	1285	109	35391	http://www.ebi.ac.uk/QuickGO/GTerm?id=GO:0098589
5	4,5	apical plasma membrane	GO:0016324	2.15×10-3	1.12×10-2	ATP6V0D1|0.74;CYBA|0.7;CSPG4|0.69;ATP1B1|0.69;SLC7A5|0.63	5	292	109	35391	http://www.ebi.ac.uk/QuickGO/GTerm?id=GO:0016324
5	4,5	cytoplasmic vesicle	GO:0031410	2.17×10-3	1.12×10-2	CLIP1|1.66;DBNL|1.6;SRI|1.57;ATP6V0D1|0.74;BSG|0.73;ACP2|0.73;DLD|0.73;ITGA5|0.73;CYBA|0.7;HYOU1|0.69;GANAB|0.64;GOLIM4|0.62	12	1491	109	35391	http://www.ebi.ac.uk/QuickGO/GTerm?id=GO:0031410
5	4,5	cytoplasmic vesicle part	GO:0044433	2.19×10-3	1.12×10-2	CLIP1|1.66;DBNL|1.6;SRI|1.57;ATP6V0D1|0.74;BSG|0.73;DLD|0.73;CYBA|0.7;HYOU1|0.69	8	745	109	35391	http://www.ebi.ac.uk/QuickGO/GTerm?id=GO:0044433
6	5,6	chromosome	GO:0005694	2.30×10-3	1.17×10-2	CDKN2A|1.86;CLIP1|1.66;PPP1R12A|1.54;SMARCA4|0.74;HDAC2|0.73;TRRAP|0.72;SMARCA5|0.7;TOP1|0.68;TOP2A|0.6;SSRP1|0.5	10	1111	109	35391	http://www.ebi.ac.uk/QuickGO/GTerm?id=GO:0005694
6	5,6	nucleolus	GO:0005730	2.65×10-3	1.32×10-2	SMARCA4|0.74;C1QBP|0.7;SMARCA5|0.7;HNRNPR|0.69;TOP1|0.68;PARP1|0.66;SLC7A5|0.63;TOP2A|0.6;BMS1|0.54;EWSR1|0.53;SSRP1|0.5	11	1327	109	35391	http://www.ebi.ac.uk/QuickGO/GTerm?id=GO:0005730
4	4	viral integration complex	GO:0019035	3.08×10-3	1.49×10-2	TOP2A|0.6	1	1	109	35391	http://www.ebi.ac.uk/QuickGO/GTerm?id=GO:0019035
7	5,6,7	mitochondrial endopeptidase Clp complex	GO:0009841	3.08×10-3	1.49×10-2	CLPX|0.67	1	1	109	35391	http://www.ebi.ac.uk/QuickGO/GTerm?id=GO:0009841
4	4	glucosidase II complex	GO:0017177	3.08×10-3	1.49×10-2	GANAB|0.64	1	1	109	35391	http://www.ebi.ac.uk/QuickGO/GTerm?id=GO:0017177
4	4	neuron projection	GO:0043005	3.52×10-3	1.68×10-2	STMN1|1.67;DBNL|1.6;SRI|1.57;ATP6V0D1|0.74;ACP2|0.73;ALCAM|0.73;CYBA|0.7;FUS|0.67;ACAD9|0.64	9	988	109	35391	http://www.ebi.ac.uk/QuickGO/GTerm?id=GO:0043005
3	3	neuron part	GO:0097458	4.77×10-3	2.25×10-2	STMN1|1.67;DBNL|1.6;SRI|1.57;ATP6V0D1|0.74;SMARCA4|0.74;ACP2|0.73;ALCAM|0.73;CYBA|0.7;TOP1|0.68;FUS|0.67;ACAD9|0.64	11	1435	109	35391	http://www.ebi.ac.uk/QuickGO/GTerm?id=GO:0097458
4	4	somatodendritic compartment	GO:0036477	5.41×10-3	2.53×10-2	DBNL|1.6;SRI|1.57;ALCAM|0.73;CYBA|0.7;TOP1|0.68;FUS|0.67;ACAD9|0.64	7	686	109	35391	http://www.ebi.ac.uk/QuickGO/GTerm?id=GO:0036477
4	4	plasma membrane region	GO:0098590	5.54×10-3	2.56×10-2	ATP6V0D1|0.74;ITGA5|0.73;CYBA|0.7;CSPG4|0.69;ATP1B1|0.69;DNAJA3|0.69;ITGB4|0.65;SLC7A5|0.63;CD44|0.47	9	1060	109	35391	http://www.ebi.ac.uk/QuickGO/GTerm?id=GO:0098590
4	4	sarcolemma	GO:0042383	5.60×10-3	2.56×10-2	SRI|1.57;BSG|0.73;ATP1B1|0.69	3	116	109	35391	http://www.ebi.ac.uk/QuickGO/GTerm?id=GO:0042383
3	3	apical part of cell	GO:0045177	5.66×10-3	2.56×10-2	ATP6V0D1|0.74;CYBA|0.7;CSPG4|0.69;ATP1B1|0.69;SLC7A5|0.63	5	367	109	35391	http://www.ebi.ac.uk/QuickGO/GTerm?id=GO:0045177
4	4	endopeptidase Clp complex	GO:0009368	6.15×10-3	2.66×10-2	CLPX|0.67	1	2	109	35391	http://www.ebi.ac.uk/QuickGO/GTerm?id=GO:0009368
9	6,7,8,9	transcription factor TFIIF complex	GO:0005674	6.15×10-3	2.66×10-2	GTF2F1|1.8	1	2	109	35391	http://www.ebi.ac.uk/QuickGO/GTerm?id=GO:0005674
5	5	macrophage migration inhibitory factor receptor complex	GO:0035692	6.15×10-3	2.66×10-2	CD44|0.47	1	2	109	35391	http://www.ebi.ac.uk/QuickGO/GTerm?id=GO:0035692
6	5,6	mitochondrial degradosome	GO:0045025	6.15×10-3	2.66×10-2	PNPT1|0.69	1	2	109	35391	http://www.ebi.ac.uk/QuickGO/GTerm?id=GO:0045025
8	5,6,7,8	microtubule organizing center	GO:0005815	7.03×10-3	3.01×10-2	NDRG1|1.88;PSMA1|1.74;CLIP1|1.66;PPP1R12A|1.54;ATP6V0D1|0.74;KIF2A|0.71;CDK1|0.69;TOP2A|0.6	8	906	109	35391	http://www.ebi.ac.uk/QuickGO/GTerm?id=GO:0005815
3	3	mitochondrial membrane part	GO:0044455	7.69×10-3	3.26×10-2	ATP5L|0.72;PTPMT1|0.71;NDUFA10|0.71;NDUFA13|0.7	4	251	109	35391	http://www.ebi.ac.uk/QuickGO/GTerm?id=GO:0044455
6	5,6	cytoplasmic vesicle membrane	GO:0030659	8.60×10-3	3.61×10-2	CLIP1|1.66;DBNL|1.6;SRI|1.57;ATP6V0D1|0.74;BSG|0.73;CYBA|0.7	6	571	109	35391	http://www.ebi.ac.uk/QuickGO/GTerm?id=GO:0030659
8	5,7,8	senescence-associated heterochromatin focus	GO:0035985	9.21×10-3	3.72×10-2	CDKN2A|1.86	1	3	109	35391	http://www.ebi.ac.uk/QuickGO/GTerm?id=GO:0035985
6	5,6	alphav-beta3 integrin-vitronectin complex	GO:0071062	9.21×10-3	3.72×10-2	ITGA5|0.73	1	3	109	35391	http://www.ebi.ac.uk/QuickGO/GTerm?id=GO:0071062
5	3,4,5	dendritic spine neck	GO:0044326	9.21×10-3	3.72×10-2	SRI|1.57	1	3	109	35391	http://www.ebi.ac.uk/QuickGO/GTerm?id=GO:0044326
6	4,5,6	acrosomal matrix	GO:0043159	9.21×10-3	3.72×10-2	DLD|0.73	1	3	109	35391	http://www.ebi.ac.uk/QuickGO/GTerm?id=GO:0043159
3	3	sperm part	GO:0097223	9.74×10-3	3.90×10-2	BSG|0.73;DLD|0.73;KIF2A|0.71	3	142	109	35391	http://www.ebi.ac.uk/QuickGO/GTerm?id=GO:0097223
4	4	vesicle membrane	GO:0012506	9.84×10-3	3.90×10-2	CLIP1|1.66;DBNL|1.6;SRI|1.57;ATP6V0D1|0.74;BSG|0.73;CYBA|0.7	6	588	109	35391	http://www.ebi.ac.uk/QuickGO/GTerm?id=GO:0012506
7	5,6,7	smooth endoplasmic reticulum	GO:0005790	1.01×10-2	3.95×10-2	SRI|1.57;HYOU1|0.69	2	49	109	35391	http://www.ebi.ac.uk/QuickGO/GTerm?id=GO:0005790
6	5,6	nuclear chromosome	GO:0000228	1.05×10-2	4.07×10-2	SMARCA4|0.74;HDAC2|0.73;TRRAP|0.72;SMARCA5|0.7;TOP1|0.68;TOP2A|0.6	6	596	109	35391	http://www.ebi.ac.uk/QuickGO/GTerm?id=GO:0000228
5	5	cytoplasmic membrane-bounded vesicle	GO:0016023	1.07×10-2	4.12×10-2	CLIP1|1.66;DBNL|1.6;SRI|1.57;ATP6V0D1|0.74;BSG|0.73;DLD|0.73;CYBA|0.7;HYOU1|0.69;GANAB|0.64;GOLIM4|0.62	10	1389	109	35391	http://www.ebi.ac.uk/QuickGO/GTerm?id=GO:0016023
8	7,8	lysosome	GO:0005764	1.09×10-2	4.15×10-2	ATP6V0D1|0.74;ACP2|0.73;GNS|0.73;CTSS|0.7;CSPG4|0.69;PCYOX1|0.61	6	601	109	35391	http://www.ebi.ac.uk/QuickGO/GTerm?id=GO:0005764
5	4,5	chromosomal part	GO:0044427	1.12×10-2	4.25×10-2	CDKN2A|1.86;CLIP1|1.66;PPP1R12A|1.54;SMARCA4|0.74;HDAC2|0.73;TRRAP|0.72;SMARCA5|0.7;TOP1|0.68	8	984	109	35391	http://www.ebi.ac.uk/QuickGO/GTerm?id=GO:0044427
7	6,7	lytic vacuole	GO:0000323	1.15×10-2	4.30×10-2	ATP6V0D1|0.74;ACP2|0.73;GNS|0.73;CTSS|0.7;CSPG4|0.69;PCYOX1|0.61	6	608	109	35391	http://www.ebi.ac.uk/QuickGO/GTerm?id=GO:0000323
4	4	inner mitochondrial membrane protein complex	GO:0098800	1.17×10-2	4.35×10-2	ATP5L|0.72;NDUFA10|0.71;NDUFA13|0.7	3	152	109	35391	http://www.ebi.ac.uk/QuickGO/GTerm?id=GO:0098800
6	5,6	vacuole	GO:0005773	1.19×10-2	4.36×10-2	ATP6V0D1|0.74;ACP2|0.73;DLD|0.73;GNS|0.73;CTSS|0.7;CSPG4|0.69;PCYOX1|0.61	7	799	109	35391	http://www.ebi.ac.uk/QuickGO/GTerm?id=GO:0005773
4	4	DNA topoisomerase complex (ATP-hydrolyzing)	GO:0009330	1.23×10-2	4.36×10-2	TOP2A|0.6	1	4	109	35391	http://www.ebi.ac.uk/QuickGO/GTerm?id=GO:0009330
8	6,7,8	macropinosome	GO:0044354	1.23×10-2	4.36×10-2	CLIP1|1.66	1	4	109	35391	http://www.ebi.ac.uk/QuickGO/GTerm?id=GO:0044354
7	5,6,7	pinosome	GO:0044352	1.23×10-2	4.36×10-2	CLIP1|1.66	1	4	109	35391	http://www.ebi.ac.uk/QuickGO/GTerm?id=GO:0044352
10	6,7,8,9,10	endolysosome lumen	GO:0036021	1.23×10-2	4.36×10-2	CTSS|0.7	1	4	109	35391	http://www.ebi.ac.uk/QuickGO/GTerm?id=GO:0036021
6	5,6	perinuclear region of cytoplasm	GO:0048471	1.52×10-2	5.35×10-2	NDRG1|1.88;S100A6|1.52;AIFM1|0.74;YBX3|0.72;CYBA|0.7;FUS|0.67	6	647	109	35391	http://www.ebi.ac.uk/QuickGO/GTerm?id=GO:0048471
5	5	mitochondrial respiratory chain complex I	GO:0005747	1.53×10-2	5.35×10-2	NDUFA10|0.71;NDUFA13|0.7	2	61	109	35391	http://www.ebi.ac.uk/QuickGO/GTerm?id=GO:0005747
5	5	dendrite	GO:0030425	1.58×10-2	5.50×10-2	DBNL|1.6;SRI|1.57;CYBA|0.7;FUS|0.67;ACAD9|0.64	5	474	109	35391	http://www.ebi.ac.uk/QuickGO/GTerm?id=GO:0030425
4	4	respiratory chain complex I	GO:0045271	1.67×10-2	5.71×10-2	NDUFA10|0.71;NDUFA13|0.7	2	64	109	35391	http://www.ebi.ac.uk/QuickGO/GTerm?id=GO:0045271
5	4,5	NADH dehydrogenase complex	GO:0030964	1.67×10-2	5.71×10-2	NDUFA10|0.71;NDUFA13|0.7	2	64	109	35391	http://www.ebi.ac.uk/QuickGO/GTerm?id=GO:0030964
6	5,6	microbody	GO:0042579	1.70×10-2	5.72×10-2	ECH1|0.72;GSTK1|0.56;HSD17B4|0.54	3	175	109	35391	http://www.ebi.ac.uk/QuickGO/GTerm?id=GO:0042579
7	6,7	peroxisome	GO:0005777	1.70×10-2	5.72×10-2	ECH1|0.72;GSTK1|0.56;HSD17B4|0.54	3	175	109	35391	http://www.ebi.ac.uk/QuickGO/GTerm?id=GO:0005777
7	7	PCAF complex	GO:0000125	1.83×10-2	6.02×10-2	TRRAP|0.72	1	6	109	35391	http://www.ebi.ac.uk/QuickGO/GTerm?id=GO:0000125
8	5,6,8	chromaffin granule membrane	GO:0042584	1.83×10-2	6.02×10-2	SRI|1.57	1	6	109	35391	http://www.ebi.ac.uk/QuickGO/GTerm?id=GO:0042584
7	5,6,7	integral component of cytoplasmic side of endoplasmic reticulum membrane	GO:0071458	1.83×10-2	6.02×10-2	HM13|0.71	1	6	109	35391	http://www.ebi.ac.uk/QuickGO/GTerm?id=GO:0071458
4	3,4	ribonucleoprotein complex	GO:0030529	1.92×10-2	6.25×10-2	PSMA1|1.74;SRRM1|1.69;MRPL21|0.74;MRPL54|0.72;YBX3|0.72;HNRNPR|0.69;USP39|0.69;TOP1|0.68;FUS|0.67	9	1301	109	35391	http://www.ebi.ac.uk/QuickGO/GTerm?id=GO:0030529
5	4,5	proton-transporting two-sector ATPase complex, proton-transporting domain	GO:0033177	1.98×10-2	6.40×10-2	ATP6V0D1|0.74;ATP5L|0.72	2	70	109	35391	http://www.ebi.ac.uk/QuickGO/GTerm?id=GO:0033177
7	5,6,7	rough endoplasmic reticulum	GO:0005791	2.09×10-2	6.57×10-2	HM13|0.71;SEC62|0.68	2	72	109	35391	http://www.ebi.ac.uk/QuickGO/GTerm?id=GO:0005791
5	3,4,5	dendritic spine head	GO:0044327	2.14×10-2	6.57×10-2	FUS|0.67	1	7	109	35391	http://www.ebi.ac.uk/QuickGO/GTerm?id=GO:0044327
7	5,7	chromaffin granule	GO:0042583	2.14×10-2	6.57×10-2	SRI|1.57	1	7	109	35391	http://www.ebi.ac.uk/QuickGO/GTerm?id=GO:0042583
7	4,7	PTW/PP1 phosphatase complex	GO:0072357	2.14×10-2	6.57×10-2	PPP1R12A|1.54	1	7	109	35391	http://www.ebi.ac.uk/QuickGO/GTerm?id=GO:0072357
4	4	hemidesmosome	GO:0030056	2.14×10-2	6.57×10-2	ITGB4|0.65	1	7	109	35391	http://www.ebi.ac.uk/QuickGO/GTerm?id=GO:0030056
6	6	RSF complex	GO:0031213	2.14×10-2	6.57×10-2	SMARCA5|0.7	1	7	109	35391	http://www.ebi.ac.uk/QuickGO/GTerm?id=GO:0031213
8	6,7,8	nuclear replication fork	GO:0043596	2.14×10-2	6.57×10-2	SMARCA5|0.7;TOP1|0.68	2	73	109	35391	http://www.ebi.ac.uk/QuickGO/GTerm?id=GO:0043596
6	6	endocytic vesicle	GO:0030139	2.35×10-2	7.11×10-2	ATP6V0D1|0.74;CYBA|0.7;HYOU1|0.69;GOLIM4|0.62	4	351	109	35391	http://www.ebi.ac.uk/QuickGO/GTerm?id=GO:0030139
4	4	perikaryon	GO:0043204	2.37×10-2	7.11×10-2	TOP1|0.68;FUS|0.67	2	77	109	35391	http://www.ebi.ac.uk/QuickGO/GTerm?id=GO:0043204
6	4,6	secretory granule	GO:0030141	2.37×10-2	7.11×10-2	SRI|1.57;BSG|0.73;DLD|0.73;CYBA|0.7	4	352	109	35391	http://www.ebi.ac.uk/QuickGO/GTerm?id=GO:0030141
6	6	NURF complex	GO:0016589	2.44×10-2	7.11×10-2	SMARCA5|0.7	1	8	109	35391	http://www.ebi.ac.uk/QuickGO/GTerm?id=GO:0016589
7	6,7	sarcoplasmic reticulum lumen	GO:0033018	2.44×10-2	7.11×10-2	ASPH|0.63	1	8	109	35391	http://www.ebi.ac.uk/QuickGO/GTerm?id=GO:0033018
9	5,6,7,8,9	endolysosome	GO:0036019	2.44×10-2	7.11×10-2	CTSS|0.7	1	8	109	35391	http://www.ebi.ac.uk/QuickGO/GTerm?id=GO:0036019
7	5,6,7	cortical endoplasmic reticulum	GO:0032541	2.44×10-2	7.11×10-2	ASPH|0.63	1	8	109	35391	http://www.ebi.ac.uk/QuickGO/GTerm?id=GO:0032541
6	5,6	endoplasmic reticulum-Golgi intermediate compartment	GO:0005793	2.48×10-2	7.19×10-2	SERPINH1|0.72;MYDGF|0.65	2	79	109	35391	http://www.ebi.ac.uk/QuickGO/GTerm?id=GO:0005793
7	5,6,7	nuclear chromosome part	GO:0044454	2.53×10-2	7.28×10-2	SMARCA4|0.74;HDAC2|0.73;TRRAP|0.72;SMARCA5|0.7;TOP1|0.68	5	536	109	35391	http://www.ebi.ac.uk/QuickGO/GTerm?id=GO:0044454
4	4	protein complex involved in cell adhesion	GO:0098636	2.66×10-2	7.55×10-2	ITGA5|0.73;ITGB4|0.65	2	82	109	35391	http://www.ebi.ac.uk/QuickGO/GTerm?id=GO:0098636
5	5	integrin complex	GO:0008305	2.66×10-2	7.55×10-2	ITGA5|0.73;ITGB4|0.65	2	82	109	35391	http://www.ebi.ac.uk/QuickGO/GTerm?id=GO:0008305
7	4,5,6,7	mitochondrial intermembrane space	GO:0005758	2.72×10-2	7.57×10-2	AIFM1|0.74;PNPT1|0.69	2	83	109	35391	http://www.ebi.ac.uk/QuickGO/GTerm?id=GO:0005758
8	5,6,7,8	Swr1 complex	GO:0000812	2.74×10-2	7.57×10-2	TRRAP|0.72	1	9	109	35391	http://www.ebi.ac.uk/QuickGO/GTerm?id=GO:0000812
6	4,5,6	cytoplasmic side of endoplasmic reticulum membrane	GO:0098554	2.74×10-2	7.57×10-2	HM13|0.71	1	9	109	35391	http://www.ebi.ac.uk/QuickGO/GTerm?id=GO:0098554
4	3,4	membrane protein complex	GO:0098796	2.74×10-2	7.57×10-2	DDOST|0.74;ATP6V0D1|0.74;ITGA5|0.73;STT3A|0.73;ATP5L|0.72;NDUFA10|0.71;CYBA|0.7;NDUFA13|0.7;NUP210|0.69;ATP1B1|0.69;ITGB4|0.65;ASPH|0.63	12	2090	109	35391	http://www.ebi.ac.uk/QuickGO/GTerm?id=GO:0098796
4	4	microtubule	GO:0005874	2.96×10-2	8.13×10-2	NDRG1|1.88;STMN1|1.67;CLIP1|1.66;KIF2A|0.71;CDK1|0.69	5	559	109	35391	http://www.ebi.ac.uk/QuickGO/GTerm?id=GO:0005874
6	5,6	Golgi lumen	GO:0005796	3.03×10-2	8.13×10-2	CSPG4|0.69;GOLIM4|0.62	2	88	109	35391	http://www.ebi.ac.uk/QuickGO/GTerm?id=GO:0005796
7	5,6,7	catalytic step 2 spliceosome	GO:0071013	3.03×10-2	8.13×10-2	SRRM1|1.69;HNRNPR|0.69	2	88	109	35391	http://www.ebi.ac.uk/QuickGO/GTerm?id=GO:0071013
8	5,6,7,8	junctional sarcoplasmic reticulum membrane	GO:0014701	3.04×10-2	8.13×10-2	ASPH|0.63	1	10	109	35391	http://www.ebi.ac.uk/QuickGO/GTerm?id=GO:0014701
6	4,5,6	NADPH oxidase complex	GO:0043020	3.04×10-2	8.13×10-2	CYBA|0.7	1	10	109	35391	http://www.ebi.ac.uk/QuickGO/GTerm?id=GO:0043020
4	3,4	cell projection part	GO:0044463	3.06×10-2	8.13×10-2	SRI|1.57;UBE2K|1.53;ATP6V0D1|0.74;ITGA5|0.73;KIF2A|0.71;CSPG4|0.69;FUS|0.67	7	970	109	35391	http://www.ebi.ac.uk/QuickGO/GTerm?id=GO:0044463
5	4,5	respiratory chain complex	GO:0098803	3.09×10-2	8.17×10-2	NDUFA10|0.71;NDUFA13|0.7	2	89	109	35391	http://www.ebi.ac.uk/QuickGO/GTerm?id=GO:0098803
9	5,6,7,8,9	spindle microtubule	GO:0005876	3.16×10-2	8.29×10-2	KIF2A|0.71;CDK1|0.69	2	90	109	35391	http://www.ebi.ac.uk/QuickGO/GTerm?id=GO:0005876
6	4,5,6	spliceosomal complex	GO:0005681	3.18×10-2	8.30×10-2	SRRM1|1.69;HNRNPR|0.69;USP39|0.69	3	223	109	35391	http://www.ebi.ac.uk/QuickGO/GTerm?id=GO:0005681
5	3,4,5	organelle envelope lumen	GO:0031970	3.22×10-2	8.35×10-2	AIFM1|0.74;PNPT1|0.69	2	91	109	35391	http://www.ebi.ac.uk/QuickGO/GTerm?id=GO:0031970
4	4	organelle outer membrane	GO:0031968	3.29×10-2	8.48×10-2	TMEM109|1.61;CYB5B|0.69;PHB2|0.67	3	226	109	35391	http://www.ebi.ac.uk/QuickGO/GTerm?id=GO:0031968
8	6,7,8	IkappaB kinase complex	GO:0008385	3.34×10-2	8.49×10-2	DNAJA3|0.69	1	11	109	35391	http://www.ebi.ac.uk/QuickGO/GTerm?id=GO:0008385
4	4	endoplasmic reticulum chaperone complex	GO:0034663	3.34×10-2	8.49×10-2	HYOU1|0.69	1	11	109	35391	http://www.ebi.ac.uk/QuickGO/GTerm?id=GO:0034663
7	4,5,7	acrosomal vesicle	GO:0001669	3.42×10-2	8.65×10-2	BSG|0.73;DLD|0.73	2	94	109	35391	http://www.ebi.ac.uk/QuickGO/GTerm?id=GO:0001669
3	3	outer membrane	GO:0019867	3.52×10-2	8.84×10-2	TMEM109|1.61;CYB5B|0.69;PHB2|0.67	3	232	109	35391	http://www.ebi.ac.uk/QuickGO/GTerm?id=GO:0019867
7	4,5,7	secretory granule membrane	GO:0030667	3.55×10-2	8.88×10-2	SRI|1.57;BSG|0.73	2	96	109	35391	http://www.ebi.ac.uk/QuickGO/GTerm?id=GO:0030667
4	4	external side of plasma membrane	GO:0009897	3.59×10-2	8.93×10-2	ALCAM|0.73;ITGA5|0.73;CD44|0.47	3	234	109	35391	http://www.ebi.ac.uk/QuickGO/GTerm?id=GO:0009897
6	5,6	perinuclear endoplasmic reticulum	GO:0097038	3.63×10-2	8.93×10-2	CYBA|0.7	1	12	109	35391	http://www.ebi.ac.uk/QuickGO/GTerm?id=GO:0097038
7	5,6,7	mitochondrial proton-transporting ATP synthase complex, coupling factor F(o)	GO:0000276	3.63×10-2	8.93×10-2	ATP5L|0.72	1	12	109	35391	http://www.ebi.ac.uk/QuickGO/GTerm?id=GO:0000276
6	4,5,6	nuclear envelope	GO:0005635	3.70×10-2	9.02×10-2	TMEM109|1.61;S100A6|1.52;NUP210|0.69;PARP1|0.66;TMPO|0.61	5	594	109	35391	http://www.ebi.ac.uk/QuickGO/GTerm?id=GO:0005635
5	5	transferase complex	GO:1990234	3.82×10-2	9.24×10-2	GTF2F1|1.8;DDOST|0.74;DLD|0.73;STT3A|0.73;HDAC2|0.73;TRRAP|0.72;DNAJA3|0.69	7	1018	109	35391	http://www.ebi.ac.uk/QuickGO/GTerm?id=GO:1990234
7	5,6,7	nuclear matrix	GO:0016363	3.83×10-2	9.24×10-2	SRRM1|1.69;PHB2|0.67	2	100	109	35391	http://www.ebi.ac.uk/QuickGO/GTerm?id=GO:0016363
5	5	oxoglutarate dehydrogenase complex	GO:0045252	3.93×10-2	9.38×10-2	DLD|0.73	1	13	109	35391	http://www.ebi.ac.uk/QuickGO/GTerm?id=GO:0045252
5	4,5	filopodium tip	GO:0032433	3.93×10-2	9.38×10-2	UBE2K|1.53	1	13	109	35391	http://www.ebi.ac.uk/QuickGO/GTerm?id=GO:0032433
5	4,5	basolateral plasma membrane	GO:0016323	4.03×10-2	9.56×10-2	ATP1B1|0.69;ITGB4|0.65;CD44|0.47	3	245	109	35391	http://www.ebi.ac.uk/QuickGO/GTerm?id=GO:0016323
3	3	dendritic spine	GO:0043197	4.18×10-2	9.70×10-2	SRI|1.57;FUS|0.67	2	105	109	35391	http://www.ebi.ac.uk/QuickGO/GTerm?id=GO:0043197
6	4,5,6	integral component of endoplasmic reticulum membrane	GO:0030176	4.19×10-2	9.70×10-2	TECR|0.74;HM13|0.71;ASPH|0.63	3	249	109	35391	http://www.ebi.ac.uk/QuickGO/GTerm?id=GO:0030176
9	7,8,9	transcription factor TFTC complex	GO:0033276	4.23×10-2	9.70×10-2	TRRAP|0.72	1	14	109	35391	http://www.ebi.ac.uk/QuickGO/GTerm?id=GO:0033276
6	6	npBAF complex	GO:0071564	4.23×10-2	9.70×10-2	SMARCA4|0.74	1	14	109	35391	http://www.ebi.ac.uk/QuickGO/GTerm?id=GO:0071564
5	5	axon terminus	GO:0043679	4.25×10-2	9.70×10-2	SRI|1.57;ATP6V0D1|0.74	2	106	109	35391	http://www.ebi.ac.uk/QuickGO/GTerm?id=GO:0043679
7	7	melanosome	GO:0042470	4.25×10-2	9.70×10-2	BSG|0.73;GANAB|0.64	2	106	109	35391	http://www.ebi.ac.uk/QuickGO/GTerm?id=GO:0042470
6	6	pigment granule	GO:0048770	4.25×10-2	9.70×10-2	BSG|0.73;GANAB|0.64	2	106	109	35391	http://www.ebi.ac.uk/QuickGO/GTerm?id=GO:0048770
4	4	mitochondrial respiratory chain	GO:0005746	4.32×10-2	9.76×10-2	NDUFA10|0.71;NDUFA13|0.7	2	107	109	35391	http://www.ebi.ac.uk/QuickGO/GTerm?id=GO:0005746
5	5	neuron spine	GO:0044309	4.32×10-2	9.76×10-2	SRI|1.57;FUS|0.67	2	107	109	35391	http://www.ebi.ac.uk/QuickGO/GTerm?id=GO:0044309
6	4,5,6	intrinsic component of endoplasmic reticulum membrane	GO:0031227	4.40×10-2	9.89×10-2	TECR|0.74;HM13|0.71;ASPH|0.63	3	254	109	35391	http://www.ebi.ac.uk/QuickGO/GTerm?id=GO:0031227
4	4	neuronal cell body	GO:0043025	4.52×10-2	9.89×10-2	ALCAM|0.73;CYBA|0.7;TOP1|0.68;FUS|0.67	4	433	109	35391	http://www.ebi.ac.uk/QuickGO/GTerm?id=GO:0043025
4	4	nBAF complex	GO:0071565	4.52×10-2	9.89×10-2	SMARCA4|0.74	1	15	109	35391	http://www.ebi.ac.uk/QuickGO/GTerm?id=GO:0071565
4	4	chromatin silencing complex	GO:0005677	4.52×10-2	9.89×10-2	SMARCA5|0.7	1	15	109	35391	http://www.ebi.ac.uk/QuickGO/GTerm?id=GO:0005677
10	6,7,8,9,10	Sin3 complex	GO:0016580	4.52×10-2	9.89×10-2	HDAC2|0.73	1	15	109	35391	http://www.ebi.ac.uk/QuickGO/GTerm?id=GO:0016580
7	7	STAGA complex	GO:0030914	4.52×10-2	9.89×10-2	TRRAP|0.72	1	15	109	35391	http://www.ebi.ac.uk/QuickGO/GTerm?id=GO:0030914
6	5,6	replication fork	GO:0005657	4.69×10-2	1.02×10-1	SMARCA5|0.7;TOP1|0.68	2	112	109	35391	http://www.ebi.ac.uk/QuickGO/GTerm?id=GO:0005657
9	5,6,7,8,9	microtubule plus-end	GO:0035371	4.82×10-2	1.03×10-1	CLIP1|1.66	1	16	109	35391	http://www.ebi.ac.uk/QuickGO/GTerm?id=GO:0035371
7	6,7	endocytic vesicle lumen	GO:0071682	4.82×10-2	1.03×10-1	HYOU1|0.69	1	16	109	35391	http://www.ebi.ac.uk/QuickGO/GTerm?id=GO:0071682
5	5	ESC/E(Z) complex	GO:0035098	4.82×10-2	1.03×10-1	HDAC2|0.73	1	16	109	35391	http://www.ebi.ac.uk/QuickGO/GTerm?id=GO:0035098
8	6,7,8	RNA polymerase II transcription factor complex	GO:0090575	4.84×10-2	1.03×10-1	GTF2F1|1.8;TRRAP|0.72	2	114	109	35391	http://www.ebi.ac.uk/QuickGO/GTerm?id=GO:0090575
4	4	neuron projection terminus	GO:0044306	5.07×10-2	1.08×10-1	SRI|1.57;ATP6V0D1|0.74	2	117	109	35391	http://www.ebi.ac.uk/QuickGO/GTerm?id=GO:0044306
4	4	dihydrolipoyl dehydrogenase complex	GO:0045240	5.11×10-2	1.08×10-1	DLD|0.73	1	17	109	35391	http://www.ebi.ac.uk/QuickGO/GTerm?id=GO:0045240
5	4,5	proton-transporting two-sector ATPase complex	GO:0016469	5.15×10-2	1.08×10-1	ATP6V0D1|0.74;ATP5L|0.72	2	118	109	35391	http://www.ebi.ac.uk/QuickGO/GTerm?id=GO:0016469
8	5,6,7,8	phagocytic vesicle membrane	GO:0030670	5.23×10-2	1.09×10-1	ATP6V0D1|0.74;CYBA|0.7	2	119	109	35391	http://www.ebi.ac.uk/QuickGO/GTerm?id=GO:0030670
3	3	postsynapse	GO:0098794	5.28×10-2	1.10×10-1	DBNL|1.6;SRI|1.57;DNAJA3|0.69;FUS|0.67	4	456	109	35391	http://www.ebi.ac.uk/QuickGO/GTerm?id=GO:0098794
4	4	membrane raft	GO:0045121	5.30×10-2	1.10×10-1	BSG|0.73;SERPINH1|0.72;ATP1B1|0.69	3	274	109	35391	http://www.ebi.ac.uk/QuickGO/GTerm?id=GO:0045121
6	5,6	nuclear periphery	GO:0034399	5.39×10-2	1.10×10-1	SRRM1|1.69;PHB2|0.67	2	121	109	35391	http://www.ebi.ac.uk/QuickGO/GTerm?id=GO:0034399
5	5	lamellipodium membrane	GO:0031258	5.40×10-2	1.10×10-1	CSPG4|0.69	1	18	109	35391	http://www.ebi.ac.uk/QuickGO/GTerm?id=GO:0031258
7	5,6,7	endoplasmic reticulum tubular network	GO:0071782	5.40×10-2	1.10×10-1	ASPH|0.63	1	18	109	35391	http://www.ebi.ac.uk/QuickGO/GTerm?id=GO:0071782
3	3	respiratory chain	GO:0070469	5.62×10-2	1.14×10-1	NDUFA10|0.71;NDUFA13|0.7	2	124	109	35391	http://www.ebi.ac.uk/QuickGO/GTerm?id=GO:0070469
6	5,6	endosome lumen	GO:0031904	5.69×10-2	1.14×10-1	CTSS|0.7	1	19	109	35391	http://www.ebi.ac.uk/QuickGO/GTerm?id=GO:0031904
5	5	ISWI-type complex	GO:0031010	5.69×10-2	1.14×10-1	SMARCA5|0.7	1	19	109	35391	http://www.ebi.ac.uk/QuickGO/GTerm?id=GO:0031010
4	4	tricarboxylic acid cycle enzyme complex	GO:0045239	5.69×10-2	1.14×10-1	DLD|0.73	1	19	109	35391	http://www.ebi.ac.uk/QuickGO/GTerm?id=GO:0045239
4	4	podosome	GO:0002102	5.98×10-2	1.17×10-1	DBNL|1.6	1	20	109	35391	http://www.ebi.ac.uk/QuickGO/GTerm?id=GO:0002102
5	5	sodium:potassium-exchanging ATPase complex	GO:0005890	5.98×10-2	1.17×10-1	ATP1B1|0.69	1	20	109	35391	http://www.ebi.ac.uk/QuickGO/GTerm?id=GO:0005890
6	4,5,6	triglyceride-rich lipoprotein particle	GO:0034385	5.98×10-2	1.17×10-1	PCYOX1|0.61	1	20	109	35391	http://www.ebi.ac.uk/QuickGO/GTerm?id=GO:0034385
7	5,6,7	very-low-density lipoprotein particle	GO:0034361	5.98×10-2	1.17×10-1	PCYOX1|0.61	1	20	109	35391	http://www.ebi.ac.uk/QuickGO/GTerm?id=GO:0034361
8	5,6,7,8	microtubule end	GO:1990752	5.98×10-2	1.17×10-1	CLIP1|1.66	1	20	109	35391	http://www.ebi.ac.uk/QuickGO/GTerm?id=GO:1990752
4	4	leading edge membrane	GO:0031256	6.19×10-2	1.20×10-1	ITGA5|0.73;CSPG4|0.69	2	131	109	35391	http://www.ebi.ac.uk/QuickGO/GTerm?id=GO:0031256
3	3	side of membrane	GO:0098552	6.25×10-2	1.20×10-1	S100A6|1.52;ALCAM|0.73;ITGA5|0.73;HM13|0.71;CD44|0.47	5	690	109	35391	http://www.ebi.ac.uk/QuickGO/GTerm?id=GO:0098552
5	4,5	integral component of organelle membrane	GO:0031301	6.25×10-2	1.20×10-1	TECR|0.74;HM13|0.71;PTPMT1|0.71;ASPH|0.63	4	483	109	35391	http://www.ebi.ac.uk/QuickGO/GTerm?id=GO:0031301
4	4	proton-transporting ATP synthase complex, coupling factor F(o)	GO:0045263	6.27×10-2	1.20×10-1	ATP5L|0.72	1	21	109	35391	http://www.ebi.ac.uk/QuickGO/GTerm?id=GO:0045263
8	4,5,6,8	acrosomal membrane	GO:0002080	6.27×10-2	1.20×10-1	BSG|0.73	1	21	109	35391	http://www.ebi.ac.uk/QuickGO/GTerm?id=GO:0002080
3	3	cell body	GO:0044297	6.33×10-2	1.20×10-1	ALCAM|0.73;CYBA|0.7;TOP1|0.68;FUS|0.67	4	485	109	35391	http://www.ebi.ac.uk/QuickGO/GTerm?id=GO:0044297
8	4,6,7,8	nuclear chromatin	GO:0000790	6.43×10-2	1.22×10-1	SMARCA4|0.74;HDAC2|0.73;TRRAP|0.72	3	297	109	35391	http://www.ebi.ac.uk/QuickGO/GTerm?id=GO:0000790
6	5,6	endoplasmic reticulum subcompartment	GO:0098827	6.56×10-2	1.23×10-1	ASPH|0.63	1	22	109	35391	http://www.ebi.ac.uk/QuickGO/GTerm?id=GO:0098827
6	5,6	intrinsic component of mitochondrial inner membrane	GO:0031304	6.56×10-2	1.23×10-1	PTPMT1|0.71	1	22	109	35391	http://www.ebi.ac.uk/QuickGO/GTerm?id=GO:0031304
6	6	integral component of mitochondrial inner membrane	GO:0031305	6.56×10-2	1.23×10-1	PTPMT1|0.71	1	22	109	35391	http://www.ebi.ac.uk/QuickGO/GTerm?id=GO:0031305
3	3	cell-cell junction	GO:0005911	6.63×10-2	1.23×10-1	NDRG1|1.88;ITGA5|0.73;YBX3|0.72;ATP1B1|0.69	4	493	109	35391	http://www.ebi.ac.uk/QuickGO/GTerm?id=GO:0005911
4	3,4	intrinsic component of organelle membrane	GO:0031300	6.71×10-2	1.24×10-1	TECR|0.74;HM13|0.71;PTPMT1|0.71;ASPH|0.63	4	495	109	35391	http://www.ebi.ac.uk/QuickGO/GTerm?id=GO:0031300
9	5,6,7,8,9	Sin3-type complex	GO:0070822	6.85×10-2	1.26×10-1	HDAC2|0.73	1	23	109	35391	http://www.ebi.ac.uk/QuickGO/GTerm?id=GO:0070822
2	2	membrane part	GO:0044425	7.21×10-2	1.32×10-1	TMEM109|1.61;SRI|1.57;S100A6|1.52;DDOST|0.74;SFXN3|0.74;LPCAT1|0.74;SLC25A1|0.74;TECR|0.74;ATP6V0D1|0.74;APMAP|0.74;FKBP10|0.73;BSG|0.73;ACP2|0.73;ALCAM|0.73;ITGA5|0.73;STT3A|0.73;SSR1|0.73;ATP5L|0.72;SERPINH1|0.72;MLEC|0.71;HM13|0.71;PTPMT1|0.71;NDUFA10|0.71;CYBA|0.7;NDUFA13|0.7;CSPG4|0.69;NUP210|0.69;ERLIN1|0.69;ATP1B1|0.69;DNAJA3|0.69;CYB5B|0.69;SEC62|0.68;ITGB4|0.65;SLC7A5|0.63;NCEH1|0.63;ASP…	42	11158	109	35391	http://www.ebi.ac.uk/QuickGO/GTerm?id=GO:0044425
6	3,5,6	chromatin	GO:0000785	7.23×10-2	1.32×10-1	CDKN2A|1.86;SMARCA4|0.74;HDAC2|0.73;TRRAP|0.72	4	508	109	35391	http://www.ebi.ac.uk/QuickGO/GTerm?id=GO:0000785
4	4	kinetochore	GO:0000776	7.39×10-2	1.33×10-1	CLIP1|1.66;PPP1R12A|1.54	2	145	109	35391	http://www.ebi.ac.uk/QuickGO/GTerm?id=GO:0000776
8	6,7,8	DNA-directed RNA polymerase II, holoenzyme	GO:0016591	7.39×10-2	1.33×10-1	GTF2F1|1.8;TRRAP|0.72	2	145	109	35391	http://www.ebi.ac.uk/QuickGO/GTerm?id=GO:0016591
3	3	nuclear outer membrane	GO:0005640	7.42×10-2	1.33×10-1	TMEM109|1.61	1	25	109	35391	http://www.ebi.ac.uk/QuickGO/GTerm?id=GO:0005640
4	4	cation-transporting ATPase complex	GO:0090533	7.42×10-2	1.33×10-1	ATP1B1|0.69	1	25	109	35391	http://www.ebi.ac.uk/QuickGO/GTerm?id=GO:0090533
7	7	phagocytic vesicle	GO:0045335	7.65×10-2	1.36×10-1	ATP6V0D1|0.74;CYBA|0.7	2	148	109	35391	http://www.ebi.ac.uk/QuickGO/GTerm?id=GO:0045335
4	4	replication fork protection complex	GO:0031298	7.71×10-2	1.36×10-1	TOP1|0.68	1	26	109	35391	http://www.ebi.ac.uk/QuickGO/GTerm?id=GO:0031298
8	8	NuA4 histone acetyltransferase complex	GO:0035267	7.71×10-2	1.36×10-1	TRRAP|0.72	1	26	109	35391	http://www.ebi.ac.uk/QuickGO/GTerm?id=GO:0035267
4	4	proteasome core complex, alpha-subunit complex	GO:0019773	7.71×10-2	1.36×10-1	PSMA1|1.74	1	26	109	35391	http://www.ebi.ac.uk/QuickGO/GTerm?id=GO:0019773
5	5	CHD-type complex	GO:0090545	7.99×10-2	1.38×10-1	HDAC2|0.73	1	27	109	35391	http://www.ebi.ac.uk/QuickGO/GTerm?id=GO:0090545
5	5	cytoplasmic exosome (RNase complex)	GO:0000177	7.99×10-2	1.38×10-1	PNPT1|0.69	1	27	109	35391	http://www.ebi.ac.uk/QuickGO/GTerm?id=GO:0000177
6	6	H4 histone acetyltransferase complex	GO:1902562	7.99×10-2	1.38×10-1	TRRAP|0.72	1	27	109	35391	http://www.ebi.ac.uk/QuickGO/GTerm?id=GO:1902562
7	7	H4/H2A histone acetyltransferase complex	GO:0043189	7.99×10-2	1.38×10-1	TRRAP|0.72	1	27	109	35391	http://www.ebi.ac.uk/QuickGO/GTerm?id=GO:0043189
9	6,7,8,9	NuRD complex	GO:0016581	7.99×10-2	1.38×10-1	HDAC2|0.73	1	27	109	35391	http://www.ebi.ac.uk/QuickGO/GTerm?id=GO:0016581
7	5,6,7	nuclear transcription factor complex	GO:0044798	8.19×10-2	1.41×10-1	GTF2F1|1.8;TRRAP|0.72	2	154	109	35391	http://www.ebi.ac.uk/QuickGO/GTerm?id=GO:0044798
7	4,5,6,7	sperm principal piece	GO:0097228	8.28×10-2	1.41×10-1	KIF2A|0.71	1	28	109	35391	http://www.ebi.ac.uk/QuickGO/GTerm?id=GO:0097228
6	5,6	mitochondrial proton-transporting ATP synthase complex	GO:0005753	8.28×10-2	1.41×10-1	ATP5L|0.72	1	28	109	35391	http://www.ebi.ac.uk/QuickGO/GTerm?id=GO:0005753
4	4	I-kappaB/NF-kappaB complex	GO:0033256	8.28×10-2	1.41×10-1	DNAJA3|0.69	1	28	109	35391	http://www.ebi.ac.uk/QuickGO/GTerm?id=GO:0033256
2	2	synapse	GO:0045202	8.51×10-2	1.44×10-1	DBNL|1.6;SRI|1.57;ATP6V0D1|0.74;ITGA5|0.73;DNAJA3|0.69;FUS|0.67	6	988	109	35391	http://www.ebi.ac.uk/QuickGO/GTerm?id=GO:0045202
7	6,7	microtubule cytoskeleton	GO:0015630	8.63×10-2	1.46×10-1	NDRG1|1.88;PSMA1|1.74;STMN1|1.67;CLIP1|1.66;PPP1R12A|1.54;ATP6V0D1|0.74;KIF2A|0.71;CDK1|0.69;TOP2A|0.6	9	1731	109	35391	http://www.ebi.ac.uk/QuickGO/GTerm?id=GO:0015630
7	5,6,7	nuclear transcriptional repressor complex	GO:0090568	8.84×10-2	1.49×10-1	HDAC2|0.73	1	30	109	35391	http://www.ebi.ac.uk/QuickGO/GTerm?id=GO:0090568
4	4	lamellipodium	GO:0030027	8.93×10-2	1.49×10-1	DBNL|1.6;CSPG4|0.69	2	162	109	35391	http://www.ebi.ac.uk/QuickGO/GTerm?id=GO:0030027
5	4,5	basal plasma membrane	GO:0009925	9.40×10-2	1.57×10-1	ITGB4|0.65	1	32	109	35391	http://www.ebi.ac.uk/QuickGO/GTerm?id=GO:0009925
2	2	synapse part	GO:0044456	9.63×10-2	1.60×10-1	DBNL|1.6;SRI|1.57;ATP6V0D1|0.74;DNAJA3|0.69;FUS|0.67	5	787	109	35391	http://www.ebi.ac.uk/QuickGO/GTerm?id=GO:0044456
3	3	ATPase dependent transmembrane transport complex	GO:0098533	9.68×10-2	1.60×10-1	ATP1B1|0.69	1	33	109	35391	http://www.ebi.ac.uk/QuickGO/GTerm?id=GO:0098533
4	4	axon part	GO:0033267	9.68×10-2	1.60×10-1	SRI|1.57;ATP6V0D1|0.74	2	170	109	35391	http://www.ebi.ac.uk/QuickGO/GTerm?id=GO:0033267
5	4,5	endosomal part	GO:0044440	9.84×10-2	1.61×10-1	NDRG1|1.88;ATP6V0D1|0.74;CTSS|0.7;GOLIM4|0.62	4	567	109	35391	http://www.ebi.ac.uk/QuickGO/GTerm?id=GO:0044440
4	4	proton-transporting ATP synthase complex	GO:0045259	9.96×10-2	1.63×10-1	ATP5L|0.72	1	34	109	35391	http://www.ebi.ac.uk/QuickGO/GTerm?id=GO:0045259
7	4,5,6,7	cytoskeletal part	GO:0044430	1.01×10-1	1.64×10-1	NDRG1|1.88;PSMA1|1.74;STMN1|1.67;CLIP1|1.66;DBNL|1.6;PPP1R12A|1.54;ATP6V0D1|0.74;KIF2A|0.71;CDK1|0.69;DNAJA3|0.69;TOP2A|0.6	11	2316	109	35391	http://www.ebi.ac.uk/QuickGO/GTerm?id=GO:0044430
6	4,5,6	endosome	GO:0005768	1.02×10-1	1.66×10-1	NDRG1|1.88;CLIP1|1.66;ATP6V0D1|0.74;CYBA|0.7;CTSS|0.7;GOLIM4|0.62	6	1040	109	35391	http://www.ebi.ac.uk/QuickGO/GTerm?id=GO:0005768
6	4,5,6	Golgi apparatus	GO:0005794	1.04×10-1	1.67×10-1	DBNL|1.6;LPCAT1|0.74;BSG|0.73;ITGA5|0.73;TRRAP|0.72;CYBA|0.7;CSPG4|0.69;GANAB|0.64;GOLIM4|0.62;CD44|0.47	10	2063	109	35391	http://www.ebi.ac.uk/QuickGO/GTerm?id=GO:0005794
7	6,7	peroxisomal matrix	GO:0005782	1.11×10-1	1.77×10-1	HSD17B4|0.54	1	38	109	35391	http://www.ebi.ac.uk/QuickGO/GTerm?id=GO:0005782
6	5,6	microbody lumen	GO:0031907	1.11×10-1	1.77×10-1	HSD17B4|0.54	1	38	109	35391	http://www.ebi.ac.uk/QuickGO/GTerm?id=GO:0031907
7	6,7	intermediate filament cytoskeleton	GO:0045111	1.19×10-1	1.88×10-1	CLIP1|1.66;UBE2K|1.53;SEC62|0.68	3	389	109	35391	http://www.ebi.ac.uk/QuickGO/GTerm?id=GO:0045111
7	5,6,7	vacuolar proton-transporting V-type ATPase complex	GO:0016471	1.19×10-1	1.88×10-1	ATP6V0D1|0.74	1	41	109	35391	http://www.ebi.ac.uk/QuickGO/GTerm?id=GO:0016471
4	4	T-tubule	GO:0030315	1.19×10-1	1.88×10-1	SRI|1.57	1	41	109	35391	http://www.ebi.ac.uk/QuickGO/GTerm?id=GO:0030315
5	5	axon	GO:0030424	1.21×10-1	1.91×10-1	SRI|1.57;ATP6V0D1|0.74;ALCAM|0.73	3	392	109	35391	http://www.ebi.ac.uk/QuickGO/GTerm?id=GO:0030424
8	5,7,8	mitochondrial large ribosomal subunit	GO:0005762	1.24×10-1	1.95×10-1	MRPL21|0.74	1	43	109	35391	http://www.ebi.ac.uk/QuickGO/GTerm?id=GO:0005762
7	4,6,7	organellar large ribosomal subunit	GO:0000315	1.24×10-1	1.95×10-1	MRPL21|0.74	1	43	109	35391	http://www.ebi.ac.uk/QuickGO/GTerm?id=GO:0000315
4	4	PcG protein complex	GO:0031519	1.27×10-1	1.98×10-1	HDAC2|0.73	1	44	109	35391	http://www.ebi.ac.uk/QuickGO/GTerm?id=GO:0031519
6	6	SWI/SNF complex	GO:0016514	1.27×10-1	1.98×10-1	SMARCA4|0.74	1	44	109	35391	http://www.ebi.ac.uk/QuickGO/GTerm?id=GO:0016514
5	5	mitochondrial outer membrane	GO:0005741	1.29×10-1	1.99×10-1	CYB5B|0.69;PHB2|0.67	2	202	109	35391	http://www.ebi.ac.uk/QuickGO/GTerm?id=GO:0005741
5	5	INO80-type complex	GO:0097346	1.30×10-1	2.00×10-1	TRRAP|0.72	1	45	109	35391	http://www.ebi.ac.uk/QuickGO/GTerm?id=GO:0097346
5	5	DNA-directed RNA polymerase complex	GO:0000428	1.31×10-1	2.00×10-1	GTF2F1|1.8;TRRAP|0.72	2	204	109	35391	http://www.ebi.ac.uk/QuickGO/GTerm?id=GO:0000428
6	5,6	nuclear DNA-directed RNA polymerase complex	GO:0055029	1.31×10-1	2.00×10-1	GTF2F1|1.8;TRRAP|0.72	2	204	109	35391	http://www.ebi.ac.uk/QuickGO/GTerm?id=GO:0055029
7	4,5,6,7	nuclear membrane	GO:0031965	1.32×10-1	2.00×10-1	TMEM109|1.61;NUP210|0.69;TMPO|0.61	3	408	109	35391	http://www.ebi.ac.uk/QuickGO/GTerm?id=GO:0031965
4	4	lipoprotein particle	GO:1990777	1.32×10-1	2.00×10-1	PCYOX1|0.61	1	46	109	35391	http://www.ebi.ac.uk/QuickGO/GTerm?id=GO:1990777
9	6,7,8,9	mitotic spindle	GO:0072686	1.32×10-1	2.00×10-1	CDK1|0.69	1	46	109	35391	http://www.ebi.ac.uk/QuickGO/GTerm?id=GO:0072686
5	3,4,5	plasma lipoprotein particle	GO:0034358	1.32×10-1	2.00×10-1	PCYOX1|0.61	1	46	109	35391	http://www.ebi.ac.uk/QuickGO/GTerm?id=GO:0034358
4	4	RNA polymerase complex	GO:0030880	1.33×10-1	2.00×10-1	GTF2F1|1.8;TRRAP|0.72	2	206	109	35391	http://www.ebi.ac.uk/QuickGO/GTerm?id=GO:0030880
5	5	aggresome	GO:0016235	1.35×10-1	2.02×10-1	SEC62|0.68	1	47	109	35391	http://www.ebi.ac.uk/QuickGO/GTerm?id=GO:0016235
4	4	exosome (RNase complex)	GO:0000178	1.35×10-1	2.02×10-1	PNPT1|0.69	1	47	109	35391	http://www.ebi.ac.uk/QuickGO/GTerm?id=GO:0000178
3	3	protein-lipid complex	GO:0032994	1.38×10-1	2.04×10-1	PCYOX1|0.61	1	48	109	35391	http://www.ebi.ac.uk/QuickGO/GTerm?id=GO:0032994
9	7,8,9	Cajal body	GO:0015030	1.38×10-1	2.04×10-1	LSG1|0.7	1	48	109	35391	http://www.ebi.ac.uk/QuickGO/GTerm?id=GO:0015030
6	6	SAGA-type complex	GO:0070461	1.38×10-1	2.04×10-1	TRRAP|0.72	1	48	109	35391	http://www.ebi.ac.uk/QuickGO/GTerm?id=GO:0070461
3	3	basal part of cell	GO:0045178	1.40×10-1	2.06×10-1	ITGB4|0.65	1	49	109	35391	http://www.ebi.ac.uk/QuickGO/GTerm?id=GO:0045178
7	5,6,7	proton-transporting V-type ATPase, V0 domain	GO:0033179	1.40×10-1	2.06×10-1	ATP6V0D1|0.74	1	49	109	35391	http://www.ebi.ac.uk/QuickGO/GTerm?id=GO:0033179
6	6	transferase complex, transferring phosphorus-containing groups	GO:0061695	1.48×10-1	2.17×10-1	GTF2F1|1.8;TRRAP|0.72;DNAJA3|0.69	3	431	109	35391	http://www.ebi.ac.uk/QuickGO/GTerm?id=GO:0061695
7	6,7	chromosome, centromeric region	GO:0000775	1.50×10-1	2.18×10-1	CLIP1|1.66;PPP1R12A|1.54	2	222	109	35391	http://www.ebi.ac.uk/QuickGO/GTerm?id=GO:0000775
8	5,6,7,8	recycling endosome membrane	GO:0055038	1.51×10-1	2.19×10-1	NDRG1|1.88	1	53	109	35391	http://www.ebi.ac.uk/QuickGO/GTerm?id=GO:0055038
5	5	integral component of mitochondrial membrane	GO:0032592	1.51×10-1	2.19×10-1	PTPMT1|0.71	1	53	109	35391	http://www.ebi.ac.uk/QuickGO/GTerm?id=GO:0032592
7	5,6,7	nucleoplasm part	GO:0044451	1.53×10-1	2.20×10-1	GTF2F1|1.8;SRRM1|1.69;HDAC2|0.73;TRRAP|0.72;LSG1|0.7	5	916	109	35391	http://www.ebi.ac.uk/QuickGO/GTerm?id=GO:0044451
5	5	intercalated disc	GO:0014704	1.54×10-1	2.20×10-1	ATP1B1|0.69	1	54	109	35391	http://www.ebi.ac.uk/QuickGO/GTerm?id=GO:0014704
4	4	intrinsic component of mitochondrial membrane	GO:0098573	1.54×10-1	2.20×10-1	PTPMT1|0.71	1	54	109	35391	http://www.ebi.ac.uk/QuickGO/GTerm?id=GO:0098573
6	4,5,6	sperm flagellum	GO:0036126	1.56×10-1	2.23×10-1	KIF2A|0.71	1	55	109	35391	http://www.ebi.ac.uk/QuickGO/GTerm?id=GO:0036126
7	4,5,6,7	endocytic vesicle membrane	GO:0030666	1.60×10-1	2.28×10-1	ATP6V0D1|0.74;CYBA|0.7	2	232	109	35391	http://www.ebi.ac.uk/QuickGO/GTerm?id=GO:0030666
4	4	receptor complex	GO:0043235	1.66×10-1	2.35×10-1	ITGA5|0.73;ITGB4|0.65;CD44|0.47	3	456	109	35391	http://www.ebi.ac.uk/QuickGO/GTerm?id=GO:0043235
6	5,6	cis-Golgi network	GO:0005801	1.67×10-1	2.35×10-1	GOLIM4|0.62	1	59	109	35391	http://www.ebi.ac.uk/QuickGO/GTerm?id=GO:0005801
5	4,5	vacuolar membrane	GO:0005774	1.69×10-1	2.39×10-1	ATP6V0D1|0.74;ACP2|0.73;PCYOX1|0.61	3	460	109	35391	http://www.ebi.ac.uk/QuickGO/GTerm?id=GO:0005774
4	4	transcription factor complex	GO:0005667	1.73×10-1	2.43×10-1	GTF2F1|1.8;TRRAP|0.72;PARP1|0.66	3	465	109	35391	http://www.ebi.ac.uk/QuickGO/GTerm?id=GO:0005667
5	5	BAF-type complex	GO:0090544	1.79×10-1	2.51×10-1	SMARCA4|0.74	1	64	109	35391	http://www.ebi.ac.uk/QuickGO/GTerm?id=GO:0090544
5	5	cytoplasmic microtubule	GO:0005881	1.84×10-1	2.56×10-1	CLIP1|1.66	1	66	109	35391	http://www.ebi.ac.uk/QuickGO/GTerm?id=GO:0005881
4	4	proteasome core complex	GO:0005839	1.84×10-1	2.56×10-1	PSMA1|1.74	1	66	109	35391	http://www.ebi.ac.uk/QuickGO/GTerm?id=GO:0005839
8	5,6,7,8	histone methyltransferase complex	GO:0035097	1.87×10-1	2.58×10-1	HDAC2|0.73	1	67	109	35391	http://www.ebi.ac.uk/QuickGO/GTerm?id=GO:0035097
4	4	cell-cell contact zone	GO:0044291	1.87×10-1	2.58×10-1	ATP1B1|0.69	1	67	109	35391	http://www.ebi.ac.uk/QuickGO/GTerm?id=GO:0044291
7	6,7	actin cytoskeleton	GO:0015629	1.93×10-1	2.64×10-1	DBNL|1.6;PPP1R12A|1.54;UBE2K|1.53;DNAJA3|0.69	4	737	109	35391	http://www.ebi.ac.uk/QuickGO/GTerm?id=GO:0015629
6	5,6	cytoskeleton	GO:0005856	1.94×10-1	2.64×10-1	NDRG1|1.88;PSMA1|1.74;STMN1|1.67;CLIP1|1.66;DBNL|1.6;PPP1R12A|1.54;UBE2K|1.53;ATP6V0D1|0.74;KIF2A|0.71;CDK1|0.69;DNAJA3|0.69;SEC62|0.68;TOP2A|0.6	13	3230	109	35391	http://www.ebi.ac.uk/QuickGO/GTerm?id=GO:0005856
7	4,5,6,7	microbody membrane	GO:0031903	1.94×10-1	2.64×10-1	HSD17B4|0.54	1	70	109	35391	http://www.ebi.ac.uk/QuickGO/GTerm?id=GO:0031903
5	4,5	cell-cell adherens junction	GO:0005913	1.94×10-1	2.64×10-1	NDRG1|1.88	1	70	109	35391	http://www.ebi.ac.uk/QuickGO/GTerm?id=GO:0005913
7	5,6,7	peroxisomal membrane	GO:0005778	1.94×10-1	2.64×10-1	HSD17B4|0.54	1	70	109	35391	http://www.ebi.ac.uk/QuickGO/GTerm?id=GO:0005778
6	5,6	lipid particle	GO:0005811	1.97×10-1	2.67×10-1	LPCAT1|0.74	1	71	109	35391	http://www.ebi.ac.uk/QuickGO/GTerm?id=GO:0005811
4	4	integral component of membrane	GO:0016021	2.04×10-1	2.75×10-1	TMEM109|1.61;DDOST|0.74;SFXN3|0.74;LPCAT1|0.74;SLC25A1|0.74;TECR|0.74;APMAP|0.74;BSG|0.73;ACP2|0.73;ALCAM|0.73;ITGA5|0.73;STT3A|0.73;MLEC|0.71;HM13|0.71;PTPMT1|0.71;CYBA|0.7;NDUFA13|0.7;CSPG4|0.69;NUP210|0.69;ERLIN1|0.69;ATP1B1|0.69;CYB5B|0.69;SEC62|0.68;ITGB4|0.65;SLC7A5|0.63;NCEH1|0.63;ASPH|0.63;SERINC1|0.62;GOLIM4|0.62;SLCO3A1|0.61;TMPO|0.61;CD44|0.47	32	9014	109	35391	http://www.ebi.ac.uk/QuickGO/GTerm?id=GO:0016021
5	5	phosphatase complex	GO:1903293	2.12×10-1	2.82×10-1	PPP1R12A|1.54	1	77	109	35391	http://www.ebi.ac.uk/QuickGO/GTerm?id=GO:1903293
6	3,6	protein serine/threonine phosphatase complex	GO:0008287	2.12×10-1	2.82×10-1	PPP1R12A|1.54	1	77	109	35391	http://www.ebi.ac.uk/QuickGO/GTerm?id=GO:0008287
7	4,6,7	heterochromatin	GO:0000792	2.12×10-1	2.82×10-1	CDKN2A|1.86	1	77	109	35391	http://www.ebi.ac.uk/QuickGO/GTerm?id=GO:0000792
8	5,6,7,8	histone deacetylase complex	GO:0000118	2.12×10-1	2.82×10-1	HDAC2|0.73	1	77	109	35391	http://www.ebi.ac.uk/QuickGO/GTerm?id=GO:0000118
7	6,7	condensed chromosome	GO:0000793	2.13×10-1	2.82×10-1	SMARCA5|0.7;TOP2A|0.6	2	280	109	35391	http://www.ebi.ac.uk/QuickGO/GTerm?id=GO:0000793
5	4,5	cell projection membrane	GO:0031253	2.13×10-1	2.82×10-1	ITGA5|0.73;CSPG4|0.69	2	280	109	35391	http://www.ebi.ac.uk/QuickGO/GTerm?id=GO:0031253
6	5,6	proton-transporting V-type ATPase complex	GO:0033176	2.14×10-1	2.82×10-1	ATP6V0D1|0.74	1	78	109	35391	http://www.ebi.ac.uk/QuickGO/GTerm?id=GO:0033176
5	5	ruffle membrane	GO:0032587	2.14×10-1	2.82×10-1	ITGA5|0.73	1	78	109	35391	http://www.ebi.ac.uk/QuickGO/GTerm?id=GO:0032587
6	5,6	cytoplasmic membrane-bounded vesicle lumen	GO:0060205	2.16×10-1	2.82×10-1	HYOU1|0.69	1	79	109	35391	http://www.ebi.ac.uk/QuickGO/GTerm?id=GO:0060205
6	6	cytoplasmic mRNA processing body	GO:0000932	2.16×10-1	2.82×10-1	TOP1|0.68	1	79	109	35391	http://www.ebi.ac.uk/QuickGO/GTerm?id=GO:0000932
6	5,6	caveola	GO:0005901	2.16×10-1	2.82×10-1	ATP1B1|0.69	1	79	109	35391	http://www.ebi.ac.uk/QuickGO/GTerm?id=GO:0005901
6	5,6	contractile fiber	GO:0043292	2.17×10-1	2.82×10-1	SRI|1.57;PPP1R12A|1.54	2	283	109	35391	http://www.ebi.ac.uk/QuickGO/GTerm?id=GO:0043292
4	4	vesicle lumen	GO:0031983	2.19×10-1	2.84×10-1	HYOU1|0.69	1	80	109	35391	http://www.ebi.ac.uk/QuickGO/GTerm?id=GO:0031983
4	4	inclusion body	GO:0016234	2.24×10-1	2.89×10-1	SEC62|0.68	1	82	109	35391	http://www.ebi.ac.uk/QuickGO/GTerm?id=GO:0016234
5	4,5	endosome membrane	GO:0010008	2.26×10-1	2.90×10-1	NDRG1|1.88;ATP6V0D1|0.74;GOLIM4|0.62	3	532	109	35391	http://www.ebi.ac.uk/QuickGO/GTerm?id=GO:0010008
9	6,7,8,9	Golgi cisterna membrane	GO:0032580	2.26×10-1	2.90×10-1	GOLIM4|0.62	1	83	109	35391	http://www.ebi.ac.uk/QuickGO/GTerm?id=GO:0032580
4	4	actin filament	GO:0005884	2.28×10-1	2.93×10-1	DNAJA3|0.69	1	84	109	35391	http://www.ebi.ac.uk/QuickGO/GTerm?id=GO:0005884
4	4	filopodium	GO:0030175	2.31×10-1	2.95×10-1	UBE2K|1.53	1	85	109	35391	http://www.ebi.ac.uk/QuickGO/GTerm?id=GO:0030175
6	4,5,6	cell cortex	GO:0005938	2.33×10-1	2.95×10-1	DBNL|1.6;ASPH|0.63	2	297	109	35391	http://www.ebi.ac.uk/QuickGO/GTerm?id=GO:0005938
4	4	extrinsic component of plasma membrane	GO:0019897	2.33×10-1	2.95×10-1	S100A6|1.52;DNAJA3|0.69	2	297	109	35391	http://www.ebi.ac.uk/QuickGO/GTerm?id=GO:0019897
4	4	transcriptional repressor complex	GO:0017053	2.33×10-1	2.95×10-1	HDAC2|0.73	1	86	109	35391	http://www.ebi.ac.uk/QuickGO/GTerm?id=GO:0017053
3	3	extracellular space	GO:0005615	2.34×10-1	2.96×10-1	S100A11|1.58;SMARCA4|0.74;SERPINH1|0.72;C1QBP|0.7;CTSS|0.7;MYDGF|0.65;PCYOX1|0.61	7	1624	109	35391	http://www.ebi.ac.uk/QuickGO/GTerm?id=GO:0005615
5	4,5	plasma membrane raft	GO:0044853	2.36×10-1	2.96×10-1	ATP1B1|0.69	1	87	109	35391	http://www.ebi.ac.uk/QuickGO/GTerm?id=GO:0044853
6	4,5,6	plasma membrane receptor complex	GO:0098802	2.37×10-1	2.97×10-1	ITGA5|0.73;ITGB4|0.65	2	301	109	35391	http://www.ebi.ac.uk/QuickGO/GTerm?id=GO:0098802
3	3	neuromuscular junction	GO:0031594	2.38×10-1	2.97×10-1	DNAJA3|0.69	1	88	109	35391	http://www.ebi.ac.uk/QuickGO/GTerm?id=GO:0031594
3	3	intrinsic component of membrane	GO:0031224	2.41×10-1	3.00×10-1	TMEM109|1.61;DDOST|0.74;SFXN3|0.74;LPCAT1|0.74;SLC25A1|0.74;TECR|0.74;APMAP|0.74;BSG|0.73;ACP2|0.73;ALCAM|0.73;ITGA5|0.73;STT3A|0.73;MLEC|0.71;HM13|0.71;PTPMT1|0.71;CYBA|0.7;NDUFA13|0.7;CSPG4|0.69;NUP210|0.69;ERLIN1|0.69;ATP1B1|0.69;CYB5B|0.69;SEC62|0.68;ITGB4|0.65;SLC7A5|0.63;NCEH1|0.63;ASPH|0.63;SERINC1|0.62;GOLIM4|0.62;SLCO3A1|0.61;TMPO|0.61;CD44|0.47	32	9196	109	35391	http://www.ebi.ac.uk/QuickGO/GTerm?id=GO:0031224
6	5,6	chromosomal region	GO:0098687	2.42×10-1	3.00×10-1	CLIP1|1.66;PPP1R12A|1.54	2	305	109	35391	http://www.ebi.ac.uk/QuickGO/GTerm?id=GO:0098687
7	4,6,7	mitochondrial ribosome	GO:0005761	2.52×10-1	3.11×10-1	MRPL21|0.74	1	94	109	35391	http://www.ebi.ac.uk/QuickGO/GTerm?id=GO:0005761
3	3	organellar ribosome	GO:0000313	2.52×10-1	3.11×10-1	MRPL21|0.74	1	94	109	35391	http://www.ebi.ac.uk/QuickGO/GTerm?id=GO:0000313
4	4	methyltransferase complex	GO:0034708	2.54×10-1	3.13×10-1	HDAC2|0.73	1	95	109	35391	http://www.ebi.ac.uk/QuickGO/GTerm?id=GO:0034708
9	5,6,8,9	lysosomal membrane	GO:0005765	2.61×10-1	3.18×10-1	ATP6V0D1|0.74;ACP2|0.73	2	322	109	35391	http://www.ebi.ac.uk/QuickGO/GTerm?id=GO:0005765
6	5,6	peroxisomal part	GO:0044439	2.61×10-1	3.18×10-1	HSD17B4|0.54	1	98	109	35391	http://www.ebi.ac.uk/QuickGO/GTerm?id=GO:0044439
5	4,5	microbody part	GO:0044438	2.61×10-1	3.18×10-1	HSD17B4|0.54	1	98	109	35391	http://www.ebi.ac.uk/QuickGO/GTerm?id=GO:0044438
3	3	basement membrane	GO:0005604	2.61×10-1	3.18×10-1	ITGB4|0.65	1	98	109	35391	http://www.ebi.ac.uk/QuickGO/GTerm?id=GO:0005604
8	6,7,8	Golgi cisterna	GO:0031985	2.68×10-1	3.24×10-1	GOLIM4|0.62	1	101	109	35391	http://www.ebi.ac.uk/QuickGO/GTerm?id=GO:0031985
8	8	serine/threonine protein kinase complex	GO:1902554	2.68×10-1	3.24×10-1	DNAJA3|0.69	1	101	109	35391	http://www.ebi.ac.uk/QuickGO/GTerm?id=GO:1902554
8	6,7,8	nuclear body	GO:0016604	2.74×10-1	3.30×10-1	SRRM1|1.69;LSG1|0.7	2	333	109	35391	http://www.ebi.ac.uk/QuickGO/GTerm?id=GO:0016604
6	4,5,6	lumenal side of endoplasmic reticulum membrane	GO:0098553	2.79×10-1	3.35×10-1	HM13|0.71	1	106	109	35391	http://www.ebi.ac.uk/QuickGO/GTerm?id=GO:0098553
7	5,6,7	integral component of lumenal side of endoplasmic reticulum membrane	GO:0071556	2.79×10-1	3.35×10-1	HM13|0.71	1	106	109	35391	http://www.ebi.ac.uk/QuickGO/GTerm?id=GO:0071556
4	3,4	lumenal side of membrane	GO:0098576	2.81×10-1	3.37×10-1	HM13|0.71	1	107	109	35391	http://www.ebi.ac.uk/QuickGO/GTerm?id=GO:0098576
6	5,6	Golgi membrane	GO:0000139	2.84×10-1	3.39×10-1	DBNL|1.6;LPCAT1|0.74;BSG|0.73;GOLIM4|0.62	4	876	109	35391	http://www.ebi.ac.uk/QuickGO/GTerm?id=GO:0000139
7	5,6,7	centriole	GO:0005814	2.86×10-1	3.39×10-1	TOP2A|0.6	1	109	109	35391	http://www.ebi.ac.uk/QuickGO/GTerm?id=GO:0005814
5	4,5	motile cilium	GO:0031514	2.86×10-1	3.39×10-1	KIF2A|0.71	1	109	109	35391	http://www.ebi.ac.uk/QuickGO/GTerm?id=GO:0031514
8	5,6,7,8	nuclear inner membrane	GO:0005637	2.95×10-1	3.49×10-1	TMPO|0.61	1	113	109	35391	http://www.ebi.ac.uk/QuickGO/GTerm?id=GO:0005637
5	4,5	Golgi apparatus part	GO:0044431	3.02×10-1	3.56×10-1	DBNL|1.6;LPCAT1|0.74;BSG|0.73;CSPG4|0.69;GOLIM4|0.62	5	1185	109	35391	http://www.ebi.ac.uk/QuickGO/GTerm?id=GO:0044431
6	5,6	nuclear pore	GO:0005643	3.03×10-1	3.57×10-1	NUP210|0.69	1	117	109	35391	http://www.ebi.ac.uk/QuickGO/GTerm?id=GO:0005643
4	4	cytoplasmic side of membrane	GO:0098562	3.08×10-1	3.61×10-1	S100A6|1.52;HM13|0.71	2	363	109	35391	http://www.ebi.ac.uk/QuickGO/GTerm?id=GO:0098562
8	5,6,7,8	clathrin-coated vesicle membrane	GO:0030665	3.10×10-1	3.61×10-1	DBNL|1.6	1	120	109	35391	http://www.ebi.ac.uk/QuickGO/GTerm?id=GO:0030665
7	7	protein kinase complex	GO:1902911	3.10×10-1	3.61×10-1	DNAJA3|0.69	1	120	109	35391	http://www.ebi.ac.uk/QuickGO/GTerm?id=GO:1902911
8	5,6,7,8	spindle	GO:0005819	3.16×10-1	3.67×10-1	KIF2A|0.71;CDK1|0.69	2	370	109	35391	http://www.ebi.ac.uk/QuickGO/GTerm?id=GO:0005819
3	3	plasma membrane part	GO:0044459	3.22×10-1	3.73×10-1	SRI|1.57;S100A6|1.52;ATP6V0D1|0.74;BSG|0.73;ALCAM|0.73;ITGA5|0.73;CYBA|0.7;CSPG4|0.69;ATP1B1|0.69;DNAJA3|0.69;ITGB4|0.65;SLC7A5|0.63;CD44|0.47	13	3619	109	35391	http://www.ebi.ac.uk/QuickGO/GTerm?id=GO:0044459
3	3	midbody	GO:0030496	3.29×10-1	3.80×10-1	CDK1|0.69	1	129	109	35391	http://www.ebi.ac.uk/QuickGO/GTerm?id=GO:0030496
6	5,6	large ribosomal subunit	GO:0015934	3.31×10-1	3.82×10-1	MRPL21|0.74	1	130	109	35391	http://www.ebi.ac.uk/QuickGO/GTerm?id=GO:0015934
5	5	histone acetyltransferase complex	GO:0000123	3.33×10-1	3.83×10-1	TRRAP|0.72	1	131	109	35391	http://www.ebi.ac.uk/QuickGO/GTerm?id=GO:0000123
3	3	cell periphery	GO:0071944	3.36×10-1	3.86×10-1	NDRG1|1.88;DBNL|1.6;SRI|1.57;S100A6|1.52;ATP6V0D1|0.74;BSG|0.73;ALCAM|0.73;ITGA5|0.73;HM13|0.71;C1QBP|0.7;CYBA|0.7;CSPG4|0.69;ATP1B1|0.69;DNAJA3|0.69;MDH2|0.68;PHB2|0.67;ITGB4|0.65;SLC7A5|0.63;ASPH|0.63;SERINC1|0.62;SLCO3A1|0.61;PCYOX1|0.61;EWSR1|0.53;CD44|0.47	24	7084	109	35391	http://www.ebi.ac.uk/QuickGO/GTerm?id=GO:0071944
10	4,5,6,8,9,10	Z disc	GO:0030018	3.39×10-1	3.88×10-1	SRI|1.57	1	134	109	35391	http://www.ebi.ac.uk/QuickGO/GTerm?id=GO:0030018
5	4,5	pore complex	GO:0046930	3.41×10-1	3.89×10-1	NUP210|0.69	1	135	109	35391	http://www.ebi.ac.uk/QuickGO/GTerm?id=GO:0046930
5	4,5	integral component of plasma membrane	GO:0005887	3.45×10-1	3.92×10-1	BSG|0.73;ITGA5|0.73;CYBA|0.7;CSPG4|0.69;ATP1B1|0.69;ITGB4|0.65;SLC7A5|0.63;CD44|0.47	8	2153	109	35391	http://www.ebi.ac.uk/QuickGO/GTerm?id=GO:0005887
7	5,6,7	Golgi stack	GO:0005795	3.45×10-1	3.92×10-1	GOLIM4|0.62	1	137	109	35391	http://www.ebi.ac.uk/QuickGO/GTerm?id=GO:0005795
7	7	calcium channel complex	GO:0034704	3.53×10-1	4.00×10-1	ASPH|0.63	1	141	109	35391	http://www.ebi.ac.uk/QuickGO/GTerm?id=GO:0034704
5	4,5	organelle subcompartment	GO:0031984	3.56×10-1	4.01×10-1	ASPH|0.63;GOLIM4|0.62	2	406	109	35391	http://www.ebi.ac.uk/QuickGO/GTerm?id=GO:0031984
6	6	acetyltransferase complex	GO:1902493	3.57×10-1	4.01×10-1	TRRAP|0.72	1	143	109	35391	http://www.ebi.ac.uk/QuickGO/GTerm?id=GO:1902493
4	4	protein acetyltransferase complex	GO:0031248	3.57×10-1	4.01×10-1	TRRAP|0.72	1	143	109	35391	http://www.ebi.ac.uk/QuickGO/GTerm?id=GO:0031248
7	5,6,7	recycling endosome	GO:0055037	3.59×10-1	4.02×10-1	NDRG1|1.88	1	144	109	35391	http://www.ebi.ac.uk/QuickGO/GTerm?id=GO:0055037
2	2	extracellular matrix component	GO:0044420	3.61×10-1	4.03×10-1	ITGB4|0.65	1	145	109	35391	http://www.ebi.ac.uk/QuickGO/GTerm?id=GO:0044420
6	5,6	microtubule organizing center part	GO:0044450	3.65×10-1	4.07×10-1	TOP2A|0.6	1	147	109	35391	http://www.ebi.ac.uk/QuickGO/GTerm?id=GO:0044450
9	4,5,7,8,9	I band	GO:0031674	3.69×10-1	4.10×10-1	SRI|1.57	1	149	109	35391	http://www.ebi.ac.uk/QuickGO/GTerm?id=GO:0031674
5	4,5	plasma membrane protein complex	GO:0098797	3.77×10-1	4.17×10-1	ITGA5|0.73;CYBA|0.7;ATP1B1|0.69;ITGB4|0.65	4	1008	109	35391	http://www.ebi.ac.uk/QuickGO/GTerm?id=GO:0098797
5	5	cytoplasmic ribonucleoprotein granule	GO:0036464	3.79×10-1	4.19×10-1	TOP1|0.68	1	154	109	35391	http://www.ebi.ac.uk/QuickGO/GTerm?id=GO:0036464
6	4,5,6	ribonucleoprotein granule	GO:0035770	3.83×10-1	4.22×10-1	TOP1|0.68	1	156	109	35391	http://www.ebi.ac.uk/QuickGO/GTerm?id=GO:0035770
9	5,6,7,8,9	spindle pole	GO:0000922	3.85×10-1	4.23×10-1	KIF2A|0.71	1	157	109	35391	http://www.ebi.ac.uk/QuickGO/GTerm?id=GO:0000922
3	3	plasma membrane	GO:0005886	3.86×10-1	4.23×10-1	NDRG1|1.88;DBNL|1.6;SRI|1.57;S100A6|1.52;ATP6V0D1|0.74;BSG|0.73;ALCAM|0.73;ITGA5|0.73;HM13|0.71;C1QBP|0.7;CYBA|0.7;CSPG4|0.69;ATP1B1|0.69;DNAJA3|0.69;MDH2|0.68;ITGB4|0.65;SLC7A5|0.63;ASPH|0.63;SERINC1|0.62;SLCO3A1|0.61;PCYOX1|0.61;EWSR1|0.53;CD44|0.47	23	6945	109	35391	http://www.ebi.ac.uk/QuickGO/GTerm?id=GO:0005886
4	4	intrinsic component of plasma membrane	GO:0031226	3.88×10-1	4.24×10-1	BSG|0.73;ITGA5|0.73;CYBA|0.7;CSPG4|0.69;ATP1B1|0.69;ITGB4|0.65;SLC7A5|0.63;CD44|0.47	8	2244	109	35391	http://www.ebi.ac.uk/QuickGO/GTerm?id=GO:0031226
6	5,6	cell cortex part	GO:0044448	3.94×10-1	4.30×10-1	ASPH|0.63	1	162	109	35391	http://www.ebi.ac.uk/QuickGO/GTerm?id=GO:0044448
4	4	occluding junction	GO:0070160	4.01×10-1	4.36×10-1	YBX3|0.72	1	166	109	35391	http://www.ebi.ac.uk/QuickGO/GTerm?id=GO:0070160
5	5	bicellular tight junction	GO:0005923	4.01×10-1	4.36×10-1	YBX3|0.72	1	166	109	35391	http://www.ebi.ac.uk/QuickGO/GTerm?id=GO:0005923
5	5	kinesin complex	GO:0005871	4.12×10-1	4.46×10-1	KIF2A|0.71	1	172	109	35391	http://www.ebi.ac.uk/QuickGO/GTerm?id=GO:0005871
4	4	proteasome complex	GO:0000502	4.29×10-1	4.62×10-1	PSMA1|1.74	1	181	109	35391	http://www.ebi.ac.uk/QuickGO/GTerm?id=GO:0000502
9	7,8,9	nuclear speck	GO:0016607	4.30×10-1	4.62×10-1	SRRM1|1.69	1	182	109	35391	http://www.ebi.ac.uk/QuickGO/GTerm?id=GO:0016607
4	4	apical junction complex	GO:0043296	4.30×10-1	4.62×10-1	YBX3|0.72	1	182	109	35391	http://www.ebi.ac.uk/QuickGO/GTerm?id=GO:0043296
7	7	clathrin-coated vesicle	GO:0030136	4.61×10-1	4.94×10-1	DBNL|1.6	1	200	109	35391	http://www.ebi.ac.uk/QuickGO/GTerm?id=GO:0030136
6	3,4,6	synaptic vesicle	GO:0008021	4.79×10-1	5.12×10-1	ATP6V0D1|0.74	1	211	109	35391	http://www.ebi.ac.uk/QuickGO/GTerm?id=GO:0008021
5	4,5	transmembrane transporter complex	GO:1902495	5.12×10-1	5.45×10-1	ATP1B1|0.69;ASPH|0.63	2	555	109	35391	http://www.ebi.ac.uk/QuickGO/GTerm?id=GO:1902495
3	3	postsynaptic density	GO:0014069	5.15×10-1	5.48×10-1	DBNL|1.6	1	234	109	35391	http://www.ebi.ac.uk/QuickGO/GTerm?id=GO:0014069
4	4	transporter complex	GO:1990351	5.17×10-1	5.48×10-1	ATP1B1|0.69;ASPH|0.63	2	560	109	35391	http://www.ebi.ac.uk/QuickGO/GTerm?id=GO:1990351
5	4,5	ribosomal subunit	GO:0044391	5.18×10-1	5.48×10-1	MRPL21|0.74	1	236	109	35391	http://www.ebi.ac.uk/QuickGO/GTerm?id=GO:0044391
8	4,6,7,8	sarcomere	GO:0030017	5.32×10-1	5.61×10-1	SRI|1.57	1	245	109	35391	http://www.ebi.ac.uk/QuickGO/GTerm?id=GO:0030017
6	4,5,6	ribosome	GO:0005840	5.40×10-1	5.68×10-1	MRPL21|0.74;MRPL54|0.72	2	585	109	35391	http://www.ebi.ac.uk/QuickGO/GTerm?id=GO:0005840
5	4,5	extrinsic component of cytoplasmic side of plasma membrane	GO:0031234	5.47×10-1	5.73×10-1	S100A6|1.52	1	256	109	35391	http://www.ebi.ac.uk/QuickGO/GTerm?id=GO:0031234
4	3,4	presynapse	GO:0098793	5.47×10-1	5.73×10-1	ATP6V0D1|0.74	1	256	109	35391	http://www.ebi.ac.uk/QuickGO/GTerm?id=GO:0098793
7	4,5,6,7	coated vesicle membrane	GO:0030662	5.52×10-1	5.76×10-1	DBNL|1.6	1	259	109	35391	http://www.ebi.ac.uk/QuickGO/GTerm?id=GO:0030662
7	3,5,6,7	contractile fiber part	GO:0044449	5.57×10-1	5.81×10-1	SRI|1.57	1	263	109	35391	http://www.ebi.ac.uk/QuickGO/GTerm?id=GO:0044449
3	3	extrinsic component of membrane	GO:0019898	5.59×10-1	5.81×10-1	S100A6|1.52;DNAJA3|0.69	2	606	109	35391	http://www.ebi.ac.uk/QuickGO/GTerm?id=GO:0019898
7	6,7	myofibril	GO:0030016	5.68×10-1	5.89×10-1	SRI|1.57	1	271	109	35391	http://www.ebi.ac.uk/QuickGO/GTerm?id=GO:0030016
4	3,4	cilium	GO:0005929	5.75×10-1	5.95×10-1	DLD|0.73;KIF2A|0.71	2	624	109	35391	http://www.ebi.ac.uk/QuickGO/GTerm?id=GO:0005929
7	5,6,7	cytosolic part	GO:0044445	5.82×10-1	6.01×10-1	DNAJA3|0.69	1	282	109	35391	http://www.ebi.ac.uk/QuickGO/GTerm?id=GO:0044445
6	4,6	postsynaptic membrane	GO:0045211	5.86×10-1	6.04×10-1	DNAJA3|0.69	1	285	109	35391	http://www.ebi.ac.uk/QuickGO/GTerm?id=GO:0045211
4	4	intermediate filament	GO:0005882	5.98×10-1	6.14×10-1	CLIP1|1.66	1	294	109	35391	http://www.ebi.ac.uk/QuickGO/GTerm?id=GO:0005882
6	6	cation channel complex	GO:0034703	6.17×10-1	6.32×10-1	ASPH|0.63	1	310	109	35391	http://www.ebi.ac.uk/QuickGO/GTerm?id=GO:0034703
5	4,5	cytoplasmic side of plasma membrane	GO:0009898	6.59×10-1	6.73×10-1	S100A6|1.52	1	347	109	35391	http://www.ebi.ac.uk/QuickGO/GTerm?id=GO:0009898
6	6	coated vesicle	GO:0030135	6.66×10-1	6.79×10-1	DBNL|1.6	1	354	109	35391	http://www.ebi.ac.uk/QuickGO/GTerm?id=GO:0030135
4	4	microtubule associated complex	GO:0005875	6.67×10-1	6.79×10-1	KIF2A|0.71	1	355	109	35391	http://www.ebi.ac.uk/QuickGO/GTerm?id=GO:0005875
5	3,5	synaptic membrane	GO:0097060	6.83×10-1	6.92×10-1	DNAJA3|0.69	1	370	109	35391	http://www.ebi.ac.uk/QuickGO/GTerm?id=GO:0097060
7	5,6,7	early endosome	GO:0005769	6.85×10-1	6.94×10-1	ATP6V0D1|0.74	1	373	109	35391	http://www.ebi.ac.uk/QuickGO/GTerm?id=GO:0005769
5	3,4,5	ciliary part	GO:0044441	6.91×10-1	6.98×10-1	KIF2A|0.71	1	379	109	35391	http://www.ebi.ac.uk/QuickGO/GTerm?id=GO:0044441
7	5,6,7	Golgi subcompartment	GO:0098791	6.97×10-1	7.02×10-1	GOLIM4|0.62	1	385	109	35391	http://www.ebi.ac.uk/QuickGO/GTerm?id=GO:0098791
3	3	proteinaceous extracellular matrix	GO:0005578	7.86×10-1	7.90×10-1	ITGB4|0.65	1	496	109	35391	http://www.ebi.ac.uk/QuickGO/GTerm?id=GO:0005578
5	5	ion channel complex	GO:0034702	7.95×10-1	7.97×10-1	ASPH|0.63	1	510	109	35391	http://www.ebi.ac.uk/QuickGO/GTerm?id=GO:0034702
2	2	extracellular matrix	GO:0031012	8.43×10-1	8.43×10-1	ITGB4|0.65	1	596	109	35391	http://www.ebi.ac.uk/QuickGO/GTerm?id=GO:0031012
GO, Gene Ontology.
